# Supplementary material for: Molecular basis for the folding of β-helical autotransporter passenger domains
Source: PubMed Central journal article supplement (PMC5895577; doi:10.1038/s41467-018-03593-2), 2018-04-11
Supplement: 41467_2018_3593_MOESM1_ESM.pdf [file 41467_2018_3593_MOESM1_ESM.pdf]

## **Molecular basis for the folding of $\beta$ -helical autotransporter passenger domains**

Xiaojun Yuan<sup>1#</sup>, Matthew D. Johnson<sup>1#</sup>, Jing Zhang<sup>1</sup>, Alvin W. Lo<sup>2,3</sup>, Mark A. Schembri<sup>2,3</sup>,  
Lakshmi C. Wijeyewickrema<sup>4</sup>, Robert N. Pike<sup>4</sup>, Gerard H. M. Huysmans<sup>5</sup>, Ian R. Henderson<sup>6</sup>,  
and Denisse L. Leyton<sup>1,7\*</sup>

- 1 - Research School of Biology, Australian National University, Canberra, ACT, 0200, Australia
- 2 - School of Chemistry and Molecular Biosciences, The University of Queensland, Brisbane, Queensland, 4072, Australia
- 3 - Australian Infectious Disease Research Centre, The University of Queensland, Brisbane, Queensland, 4072, Australia
- 4 - Department of Biochemistry and Genetics, La Trobe Institute for Molecular Science, La Trobe University, Melbourne, 3086, VIC, Australia
- 5 - Department of Physiology and Biophysics, Weill Cornell Medicine, New York, NY 10065, U.S.A.
- 6 - Institute of Microbiology and Infection, University of Birmingham, Birmingham, B15 2TT, UK
- 7 - Medical School, Australian National University, Canberra, ACT, 0200, Australia

#These authors contributed equally to this work

\*To whom correspondence should be addressed: [denisse.leyton@anu.edu.au](mailto:denisse.leyton@anu.edu.au)

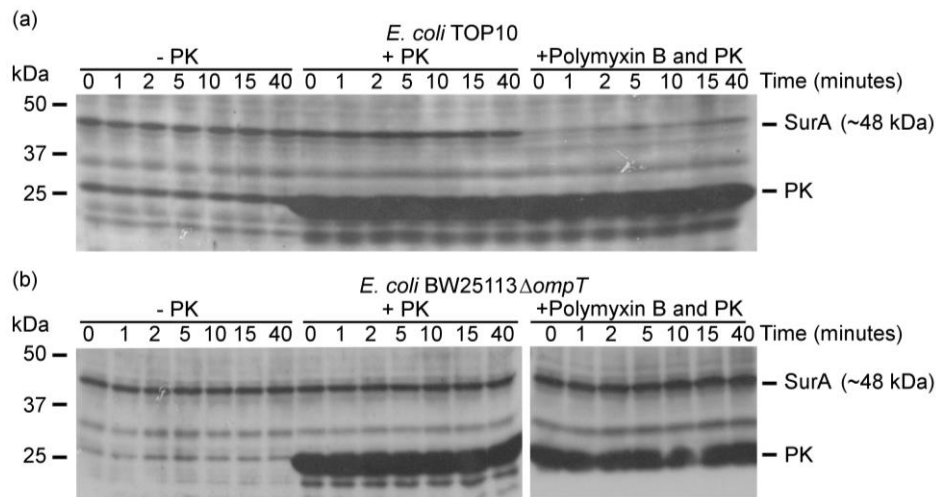

**Supplementary Figure 1 | Proteinase K does not permeabilize the outer membrane of *E. coli* TOP10 or *E. coli* BW25113 $\Delta$ ompT.** (a) *E. coli* TOP10 and (b) *E. coli* BW25113 $\Delta$ ompT incubated for up to 40 min of a mock ‘chase’ period at 25 °C and then immediately precipitated with TCA (- PK), or incubated on ice with 200 mg/mL proteinase K (+ PK), or incubated on ice with 200 mg/mL polymyxin B and 200 mg/mL proteinase K (+ Polymyxin B and PK). After addition of Phenylmethanesulfonyl fluoride (see Methods), proteinase K-treated samples were TCA precipitated and all samples were then analyzed by SDS-PAGE and immunoblotting for the periplasmic protein SurA. In both bacterial strains, the intact SurA protein (48 kDa) was observed in - PK and + PK samples. Note that a thick band corresponding to the migration position of proteinase K is also observed. These data show that the amount of proteinase K in use does not permeabilize the *E. coli* outer membrane, which remains intact during proteinase K treatment. Furthermore, SurA was degraded almost to completion by proteinase K in the presence of polymyxin B in *E. coli* TOP10. In contrast, intact SurA was observed in samples treated with proteinase K in the presence of polymyxin B in *E. coli* BW25113 $\Delta$ ompT, indicating that 200 mg/mL polymyxin B is insufficient to permeabilize this strain’s outer membrane. As a consequence, only *E. coli* TOP10 was used to perform pulse-chase assays in the presence of polymyxin B and proteinase K in this study. Images are representative of at least two independent experiments.

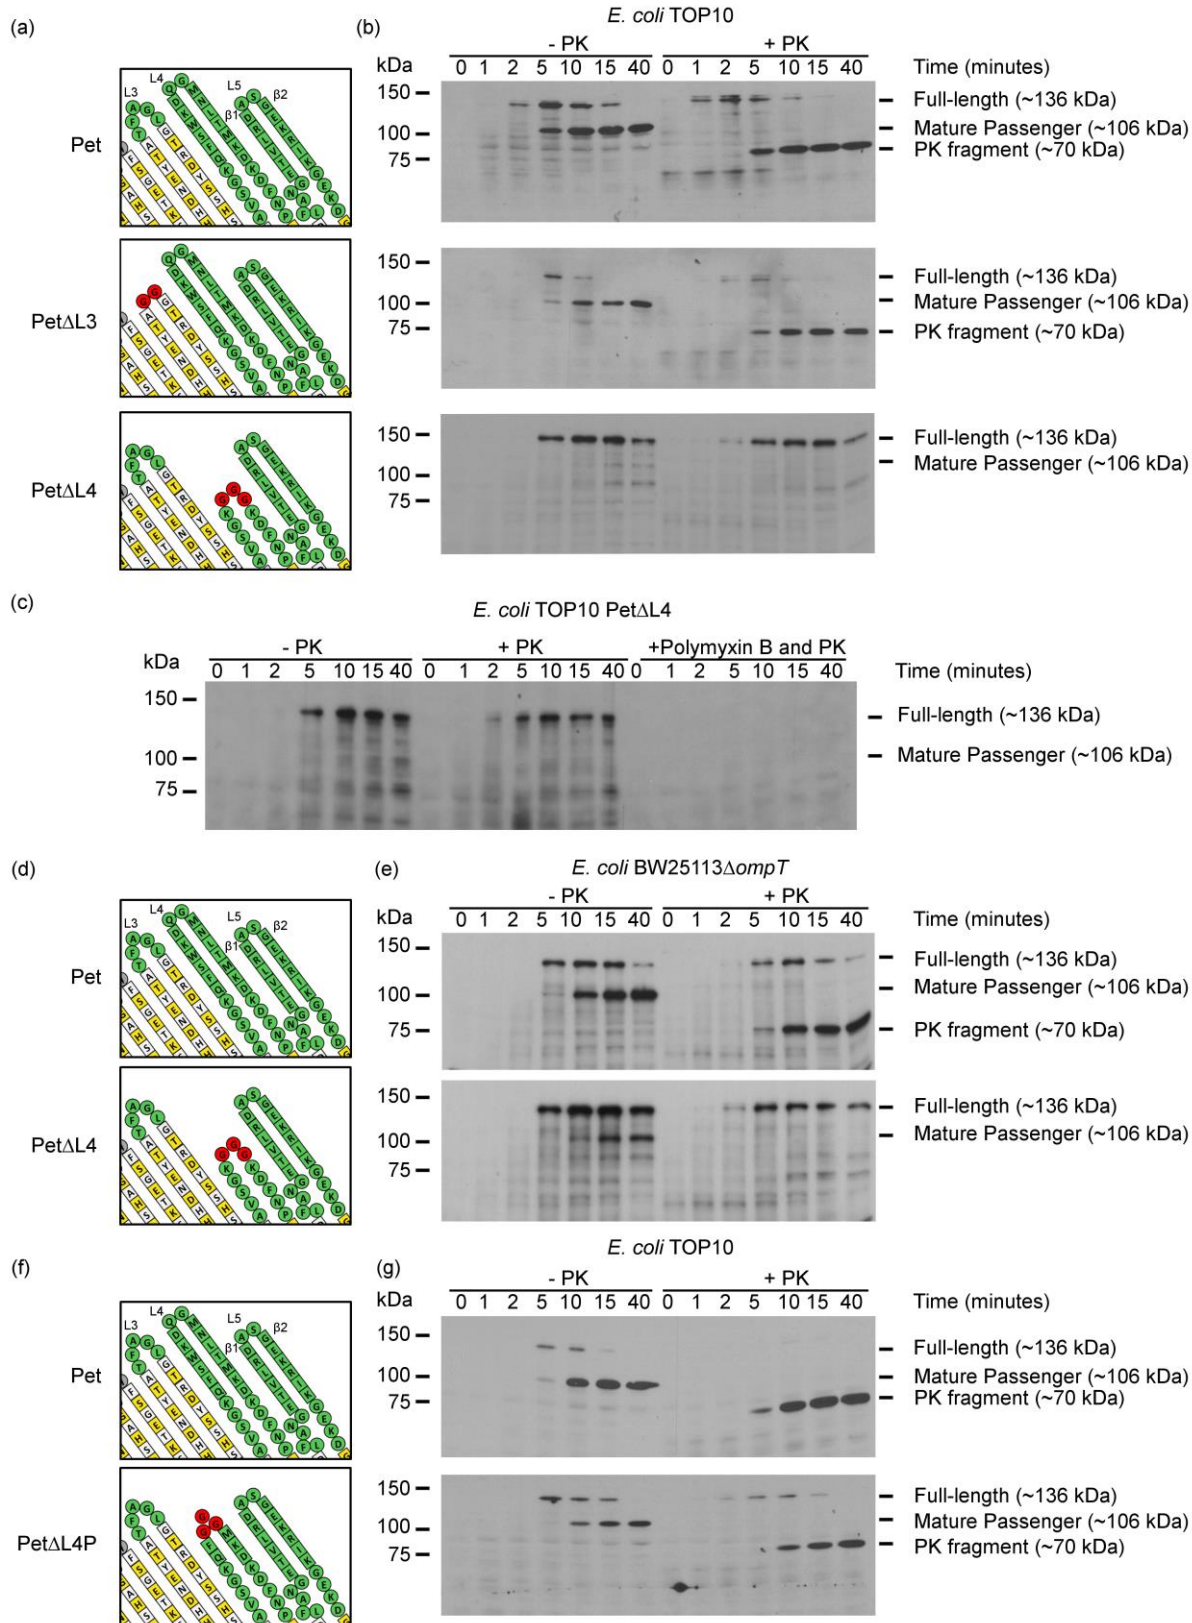

**Supplementary Figure 2 | Truncation of L4 perturbs passenger domain translocation.** (a) Topology model of the Pet  $\beta$ -barrel domain showing the L3 and L4 truncations created by replacing T<sub>1130</sub>-L<sub>1134</sub> and Q<sub>1177</sub>-D<sub>1191</sub> with two and with three glycine residues (shown in red), respectively. (b) Pulse-chase expression of Pet, Pet $\Delta$ L3 and Pet $\Delta$ L4, and sensitivity to proteinase K (PK) in *E. coli* TOP10. (c) Pulse-chase Pet $\Delta$ L4 maturation as above, but also in the presence of polymyxin B prior to the addition of proteinase K as indicated (+ Polymyxin B and PK). (d) Topology model of the Pet  $\beta$ -barrel domain showing the L4 truncation created by replacing Q<sub>1177</sub>-D<sub>1191</sub> with three glycine residues (shown in red). (e) Pulse-chase expression of Pet and Pet $\Delta$ L4, and sensitivity to proteinase K (PK) in *E. coli* BW25113 $\Delta$ ompT. (f) Topology model of the Pet  $\beta$ -barrel domain showing the partial L4 truncation created by replacing S<sub>1179</sub>-T<sub>1188</sub> with three glycine residues (shown in red). (g) Pulse-chase expression of Pet and Pet $\Delta$ L4P, and sensitivity to proteinase K (PK) in *E. coli* TOP10. All samples were TCA precipitated prior to SDS-PAGE and immunoblotting with anti-Pet passenger domain antibodies. Images are representative of at least two independent experiments.

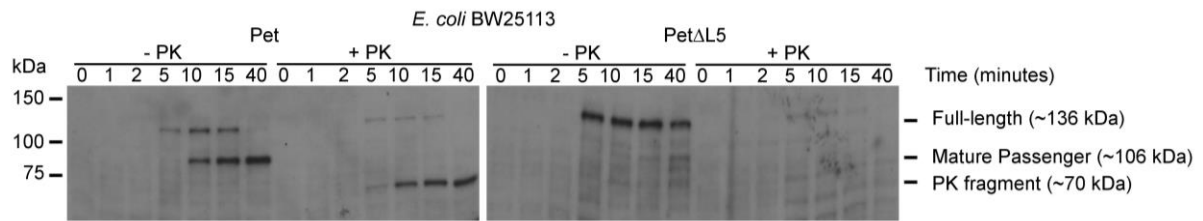

**Supplementary Figure 3 | Pet biogenesis in *E. coli* BW25113.** Pulse-chase expression of Pet and PetΔL5, and sensitivity to proteinase K (PK) in *E. coli* BW25113 monitored by SDS-PAGE and immunoblotting with anti-Pet passenger domain antibodies. All samples were TCA precipitated prior to SDS-PAGE. Image is representative of at least two independent experiments.

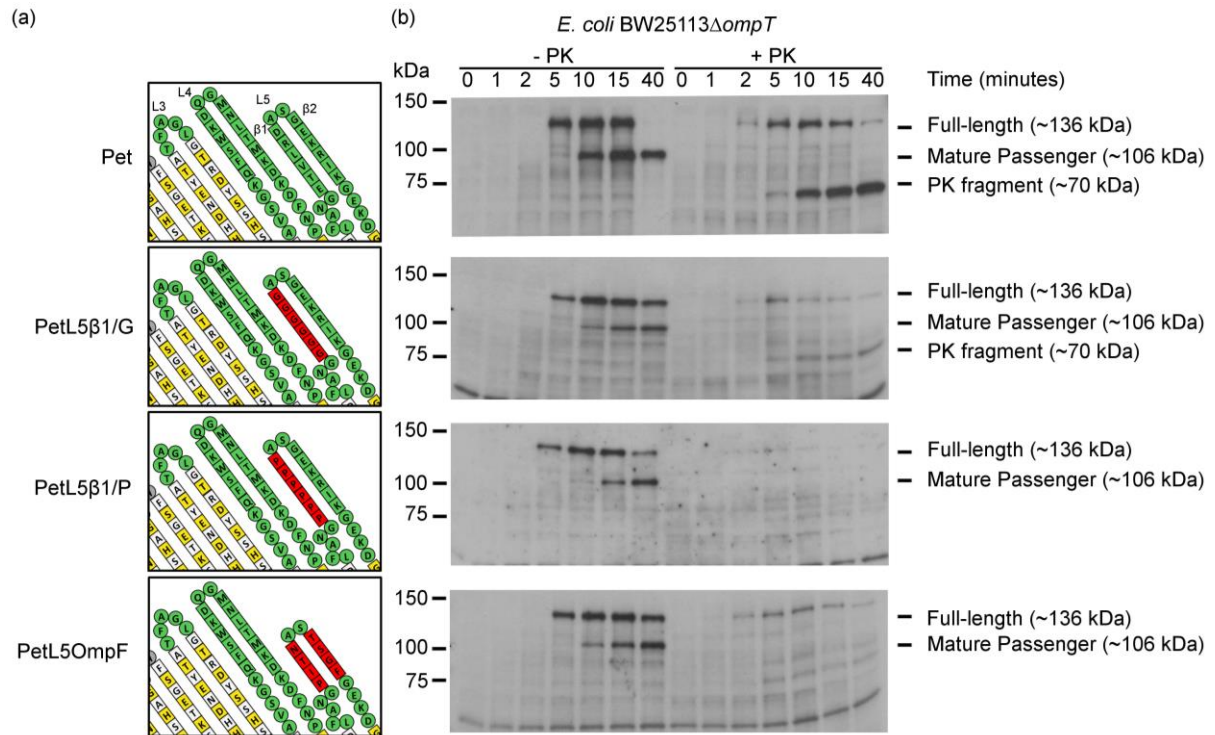

**Supplementary Figure 4 | Mutation of L5 affects folding of the Pet passenger domain.** (a) Topology model of the Pet  $\beta$ -barrel domain showing the Pet<sup>L5 $\beta$ 1/G</sup>, Pet<sup>L5 $\beta$ 1/P</sup> and Pet<sup>L5OmpF</sup> mutations (in red). (b) Pulse-chase expression of Pet, Pet<sup>L5 $\beta$ 1/G</sup>, Pet<sup>L5 $\beta$ 1/P</sup> and Pet<sup>L5OmpF</sup>, and sensitivity to proteinase K (PK) in *E. coli* BW25113 $\Delta ompT$  monitored by SDS-PAGE and immunoblotting with anti-Pet passenger domain antibodies. All samples were TCA precipitated prior to SDS-PAGE. Images are representative of at least two independent experiments.

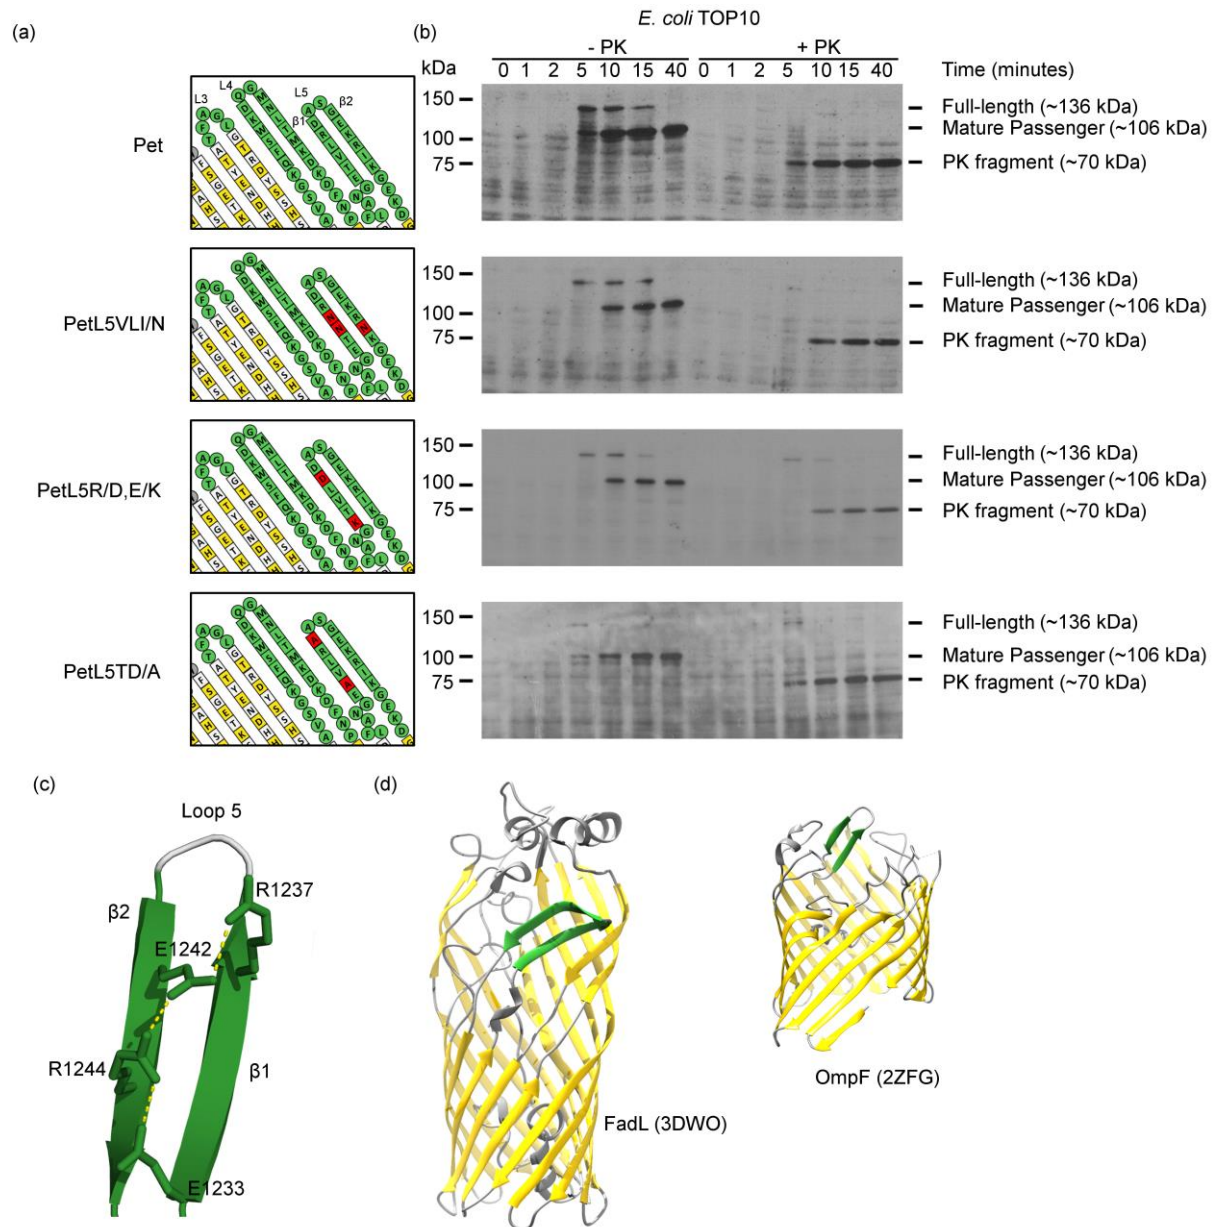

**Supplementary Figure 5 | Hydrophobic and charged residues do not mediate passenger folding.** (a) Topology model of the Pet  $\beta$ -barrel domain showing the Pet<sup>L5VLI/N</sup>, Pet<sup>L5R/D,E/K</sup> and Pet<sup>L5TD/A</sup> mutations (in red). (b) Pulse-chase expression of Pet, Pet<sup>L5VLI/N</sup>, Pet<sup>L5R/D,E/K</sup> and Pet<sup>L5TD/A</sup>, and sensitivity to proteinase K (PK) in *E. coli* TOP10 monitored by SDS-PAGE and immunoblotting with anti-Pet passenger domain antibodies. All samples were TCA precipitated prior to SDS-PAGE. Images are representative of at least two independent experiments. (c) The crystal structure of the EspP  $\beta$ -barrel domain (PDB code 3SLJ) showing putative salt-bridge interactions between R<sub>1237</sub> in  $\beta$ -strand 1 and E<sub>1242</sub> in  $\beta$ -strand 2 (top of L5), and a E<sub>1233</sub> in  $\beta$ -strand 1 and R<sub>1244</sub> in  $\beta$ -strand 2 (bottom of L5). (d) The crystal structures of FadL from *Pseudomonas aeruginosa* (PDB code 3DWO) and OmpF from *E. coli* (PDB code 2ZFG). In each case, the  $\beta$ -strands within the  $\beta$ -hairpin loop are shown in green.



(a)

```

Pet      LGY-----QFDLFA-NGETVLRDASGEKRIKGEK----DGRMLMNVGLNAEIRDN-VRF
EspP     LGY-----QFDLLA-NGETVLRDASGEKRIKGEK----DSRMLMSVGLNAEIRDN-VRF
Tsh/Hbp  LHY-----EFDLTD-SADVHLKDAAGEHQINGRK----DSRMLYGVGLNARFGDN-TRL
Vat      LHY-----EFDLTD-SADVHLKDAAGEHQINGRK----DGRMLYGVGLNARFGDN-TRL
Boa      VDY-----QFDLVA-NGETALRDASGEKRFTEK----DSRMLYNVGLNAQVKDN-VRF
Pic      TSW-----QFDLLN-NGETVLRDASGEKRIKGEK----DSRMLFNVMNAQIKDN-MRF
SigA     LGY-----QFDLFA-NGETVLRDASGEKRIKGEK----DGRILMNVGLNAEIRDN-LRF
EspI     LGY-----QFDLLA-NGETVLRDASGEKRIKGEK----DSRMLMSVGLNAEIRDN-VRF
EpeA     LGY-----QFDLLA-NGETVLRDASGEKRIKGEK----DSRMLMSVGLNAEIRDN-VRF
EaaA     LGY-----QFDLLA-NGETVLRDASGEKRIKGEK----DGRMLMSVGLNAEVRDN-IRF
Sat      LGY-----QFDLFA-NGETVLRDASGEKRIKGEK----DGRMLMNVGLNAEIRDN-LRF
EatA     LGY-----QFDLLA-NGETVLRDASGEKRFTEK----DSRMLMNVGTNVEVKDN-MRF
EspC     LGY-----QFDLLA-NGETVLRDASGEKRFTEK----DSRMLMNVGMNAEIKDN-MRF
SepA     LGY-----QFDLLA-NGETVLRDASGEKRFTEK----DSRMLMTVGMNAEIKDN-MRL
TibA     AAV-----SHEFSD-NNKVRINDTYDFRNDISGT----TGK--YGLGVNAQLTPN-AGV
BapA     VNV-----KHEFLD-GTRVR---VAGVPVSSRMA----RTWGSVGVGADYGWGER-YAI
VacA     VLQ-----EFANFG-SSNAVSLNTFKVNAVRNPL----NTHARVMGGELKLAKE-VFL
EstA     HER-----EYEDDT-QDLTMSLNSLPGNRFTEGYTPQDHLNLRVSLGFSQKLAPE-LSL
TapA     TGY-----AGTLKVAQVETVGLTSTTETGLVTP----NGALDTGAGVTLRGHHTPWTV
PspA     LGW-----QHSLSAVESEEHIAFVAGGPSFAVQSSPLMRDAAALVGVQASLALSXS-TRV
NalP     VERDLN---GRDYTVTGGFTGATAATGKTGARNMP----HTRLVAGLGADVEFGNG-WN-
Ag43     VNWVVQPSVIRTFSSRGDMRVGTSTAGSGMTFSPSQN--GTSLDLQAGLEARVREN-ITL
IcsA/VirG VNW-----KWSSKQ-YGVIM---NGMSNHQIGN----RNVIELKTGVGGRLADN-LSI
AIDA     ANW-----IH-----NTHEFGVKMSDDSQLSGS----RNQGEIKTGTIEGVITQN-LSV
Iga1     AAY-----FANYGKGVNV-----GGKSFAKKA----DNQOQY SAGVALLYRNVT LNV
BrkA     LGW-----TQEFKS-TGDVR---TNGIGHAGAGR----HGRVELGAGVDAALGKG-HNL
  
```

(b)

|         |             | Tsh/Hbp | Vat   | Boa   | Pic   | SigA  | EspI  | EspP  | EpeA  | EaaA  | Sat   | Pet   | EatA  | EspC  | SepA  |
|---------|-------------|---------|-------|-------|-------|-------|-------|-------|-------|-------|-------|-------|-------|-------|-------|
|         |             | 1       | 2     | 3     | 4     | 5     | 6     | 7     | 8     | 9     | 10    | 11    | 12    | 13    | 14    |
| Tsh/Hbp | 1 (Type_5)  | 100.0   | 98.92 | 62.09 | 62.45 | 60.65 | 61.01 | 61.73 | 62.09 | 62.45 | 62.09 | 62.45 | 59.21 | 62.09 | 61.01 |
| Vat     | 2 (Type_5)  | 98.92   | 100.0 | 61.37 | 62.45 | 61.37 | 60.65 | 61.37 | 61.73 | 62.82 | 62.45 | 62.82 | 59.21 | 62.09 | 61.01 |
| Boa     | 3 (Type_5)  | 62.09   | 61.37 | 100.0 | 71.84 | 68.59 | 68.59 | 69.68 | 69.68 | 68.59 | 68.23 | 68.95 | 64.98 | 70.04 | 67.15 |
| Pic     | 4 (Type_5)  | 62.45   | 62.45 | 71.84 | 100.0 | 79.06 | 80.14 | 80.14 | 80.14 | 80.87 | 79.06 | 79.78 | 71.48 | 79.42 | 77.26 |
| SigA    | 5 (Type_5)  | 60.65   | 61.37 | 68.59 | 79.06 | 100.0 | 86.28 | 87.73 | 87.36 | 88.09 | 88.81 | 89.17 | 71.84 | 81.23 | 78.70 |
| EspI    | 6 (Type_5)  | 61.01   | 60.65 | 68.59 | 80.14 | 86.28 | 100.0 | 96.75 | 96.39 | 90.97 | 88.81 | 89.89 | 72.56 | 79.42 | 77.26 |
| EspP    | 7 (Type_5)  | 61.73   | 61.37 | 69.68 | 80.14 | 87.73 | 96.75 | 100.0 | 99.64 | 92.42 | 89.89 | 90.97 | 73.65 | 81.23 | 79.06 |
| EpeA    | 8 (Type_5)  | 62.09   | 61.73 | 69.68 | 80.14 | 87.36 | 96.39 | 99.64 | 100.0 | 92.78 | 90.25 | 91.34 | 73.65 | 81.59 | 79.42 |
| EaaA    | 9 (Type_5)  | 62.45   | 62.82 | 68.59 | 80.87 | 88.09 | 90.97 | 92.42 | 92.78 | 100.0 | 92.42 | 93.14 | 74.37 | 81.95 | 79.42 |
| Sat     | 10 (Type_5) | 62.09   | 62.45 | 68.23 | 79.06 | 88.81 | 88.81 | 89.89 | 90.25 | 92.42 | 100.0 | 98.92 | 72.92 | 80.14 | 77.98 |
| Pet     | 11 (Type_5) | 62.45   | 62.82 | 68.95 | 79.78 | 89.17 | 89.89 | 90.97 | 91.34 | 93.14 | 98.92 | 100.0 | 73.65 | 80.87 | 78.70 |
| EatA    | 12 (Type_5) | 59.21   | 59.21 | 64.98 | 71.48 | 71.84 | 72.56 | 73.65 | 73.65 | 74.37 | 72.92 | 73.65 | 100.0 | 83.39 | 80.87 |
| EspC    | 13 (Type_5) | 62.09   | 62.09 | 70.04 | 79.42 | 81.23 | 79.42 | 81.23 | 81.59 | 81.95 | 80.14 | 80.87 | 83.39 | 100.0 | 94.22 |
| SepA    | 14 (Type_5) | 61.01   | 61.01 | 67.15 | 77.26 | 78.70 | 77.26 | 79.06 | 79.42 | 79.42 | 77.98 | 78.70 | 80.87 | 94.22 | 100.0 |

(c)

|           |              | EstA  | VacA  | NalP  | Ag43  | TapA  | PspA  | Iga1  | IcsA/VirG | AIDA  | BrkA  | TibA/TynE | BapA  |
|-----------|--------------|-------|-------|-------|-------|-------|-------|-------|-----------|-------|-------|-----------|-------|
|           |              | 1     | 2     | 3     | 4     | 5     | 6     | 7     | 8         | 9     | 10    | 11        | 12    |
| EstA      | 1 (Type_4)   | 100.0 | 15.30 | 16.01 | 12.78 | 14.03 | 18.73 | 12.88 | 16.30     | 15.99 | 14.49 | 13.62     | 14.03 |
| VacA      | 2 (Type_3)   | 15.30 | 100.0 | 11.66 | 15.65 | 13.26 | 16.73 | 15.13 | 15.30     | 14.55 | 15.90 | 15.79     | 11.64 |
| NalP      | 3 (Type_6)   | 16.01 | 11.66 | 100.0 | 13.74 | 15.27 | 17.73 | 16.04 | 13.11     | 13.86 | 16.30 | 15.30     | 13.98 |
| Ag43      | 4 (Type_13)  | 12.78 | 15.65 | 13.74 | 100.0 | 14.06 | 15.47 | 14.46 | 17.10     | 15.30 | 20.15 | 19.62     | 19.62 |
| TapA      | 5 (Type_2)   | 14.03 | 13.26 | 15.27 | 14.06 | 100.0 | 19.00 | 15.06 | 12.36     | 14.29 | 16.48 | 13.55     | 12.88 |
| PspA      | 6 (Type_1)   | 18.73 | 16.73 | 17.73 | 15.47 | 19.00 | 100.0 | 16.79 | 19.03     | 16.04 | 20.30 | 16.79     | 17.52 |
| Iga1      | 7 (Type_8)   | 12.88 | 15.13 | 16.04 | 14.46 | 15.06 | 16.79 | 100.0 | 17.18     | 15.65 | 17.75 | 24.01     | 15.93 |
| IcsA/VirG | 8 (Type_12)  | 16.30 | 15.30 | 13.11 | 17.10 | 12.36 | 19.03 | 17.18 | 100.0     | 37.46 | 18.08 | 20.37     | 18.51 |
| AIDA      | 9 (Type_13)  | 15.99 | 14.55 | 13.86 | 15.30 | 14.29 | 16.04 | 15.65 | 37.46     | 100.0 | 17.34 | 20.74     | 17.08 |
| BrkA      | 10 (Type_10) | 14.49 | 15.90 | 16.30 | 20.15 | 16.48 | 20.30 | 17.75 | 18.08     | 17.34 | 100.0 | 26.37     | 21.00 |
| TibA/TynE | 11 (Type_10) | 13.62 | 15.79 | 15.30 | 19.62 | 13.55 | 16.79 | 24.01 | 20.37     | 20.74 | 26.37 | 100.0     | 21.75 |
| BapA      | 12 (Type_14) | 14.03 | 11.64 | 13.98 | 19.62 | 12.88 | 17.52 | 15.93 | 18.51     | 17.08 | 21.00 | 21.75     | 100.0 |



**Supplementary Figure 6 | Multiple sequence alignment and percent identity of autotransporter  $\beta$ -barrel domains.** (a) Multiple sequence alignment (performed using Muscle<sup>1</sup>) on the amino acid sequence of  $\beta$ -barrel domains that are representative of 11 distinct Types. The residues corresponding to L5 of EspP (PDB 3SLJ), Tsh/Hbp (PDB 3AEH), EstA (PDB 3KVN), AIDA-I (PDB 4MEE), NalP (PDB 1UYN), and BrkA (PDB 3QQ2) are shown in blue font and mapped according to their crystal structures. The L5 regions in SPATE  $\beta$ -barrels (shown in black font and underlined) are the same length and contain several residues that are highly or completely conserved (highlighted in yellow), particularly within the regions that form a  $\beta$ -hairpin (shown in red font). The L5 regions in non-SPATE  $\beta$ -barrel domains (shown in black font) differ substantially with each other and with those in SPATEs. (b) Percent identity between SPATE  $\beta$ -barrel domains ranges from 59.21- to- 99.64 %. (c) Percent identity between non-SPATE  $\beta$ -barrel domains ranges from 11.64- to- 37.46 % and even those belonging to the same Type share low sequence identity.

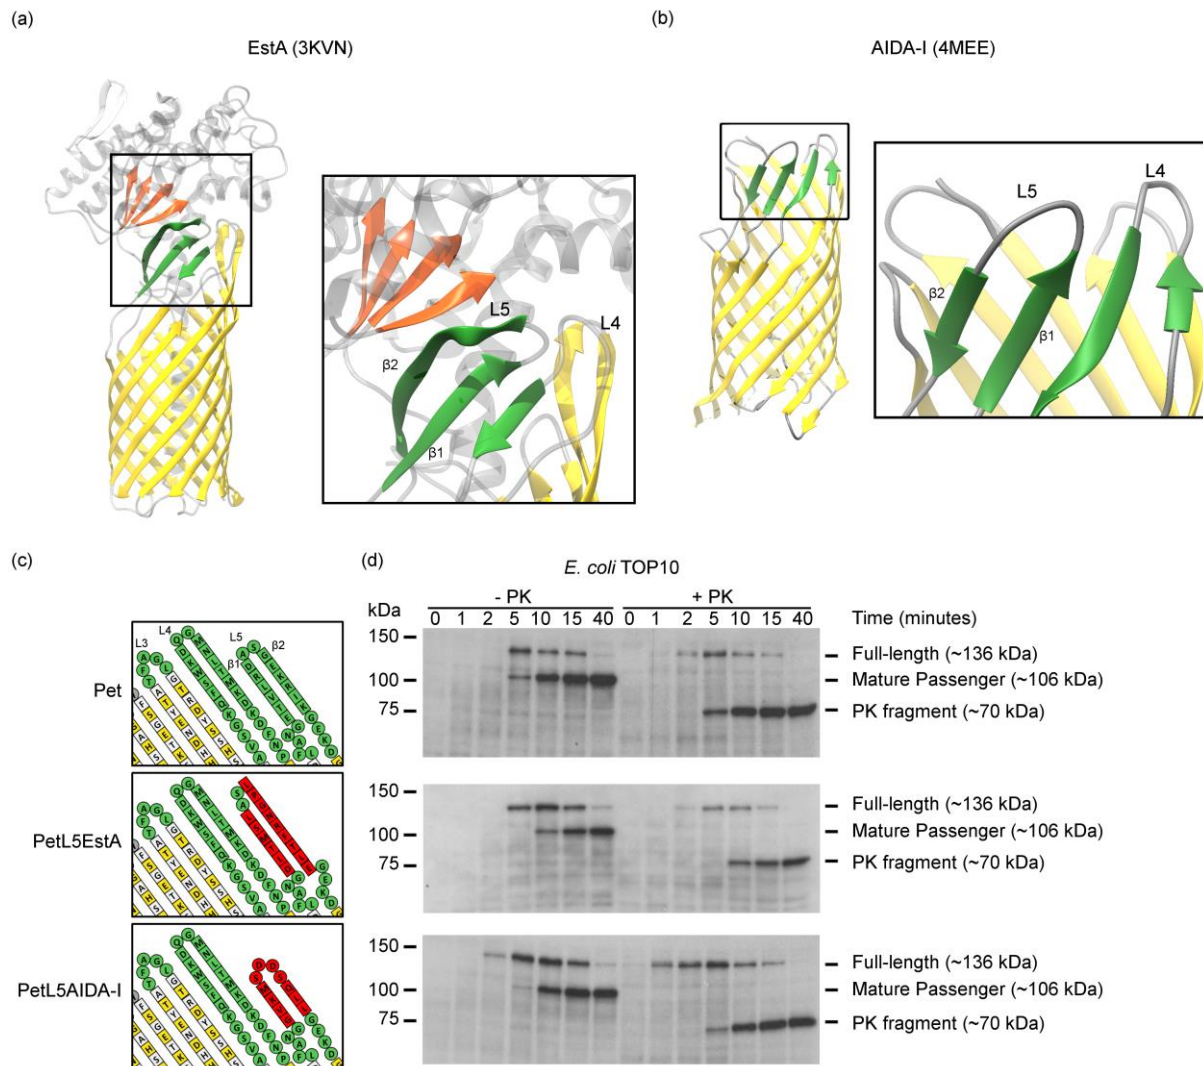

**Supplementary Figure 7 | Structural analysis of the AIDA-I and EstA  $\beta$ -barrel domains.** The crystal structures of EstA from *P. aeruginosa* (PDB code 3KVN) (a) and AIDA-I from *E. coli* (PDB code 4MEE) (b). In each case, the  $\beta$ -strands within the L5 and L4  $\beta$ -hairpins are shown in green. The central four-stranded parallel  $\beta$ -sheet within the globular passenger domain of EstA is shown in orange. (c) Topology model of the Pet  $\beta$ -barrel domain showing the Pet<sup>L5EstA</sup> and Pet<sup>L5AIDA-I</sup> mutations (in red). (d) Pulse-chase expression of Pet<sup>L5EstA</sup> and Pet<sup>L5AIDA-I</sup>, and sensitivity to proteinase K (PK) in *E. coli* TOP10 monitored by SDS-PAGE and immunoblotting with anti-Pet passenger domain antibodies. All samples were TCA precipitated prior to SDS-PAGE. Images are representative of at least two independent experiments.

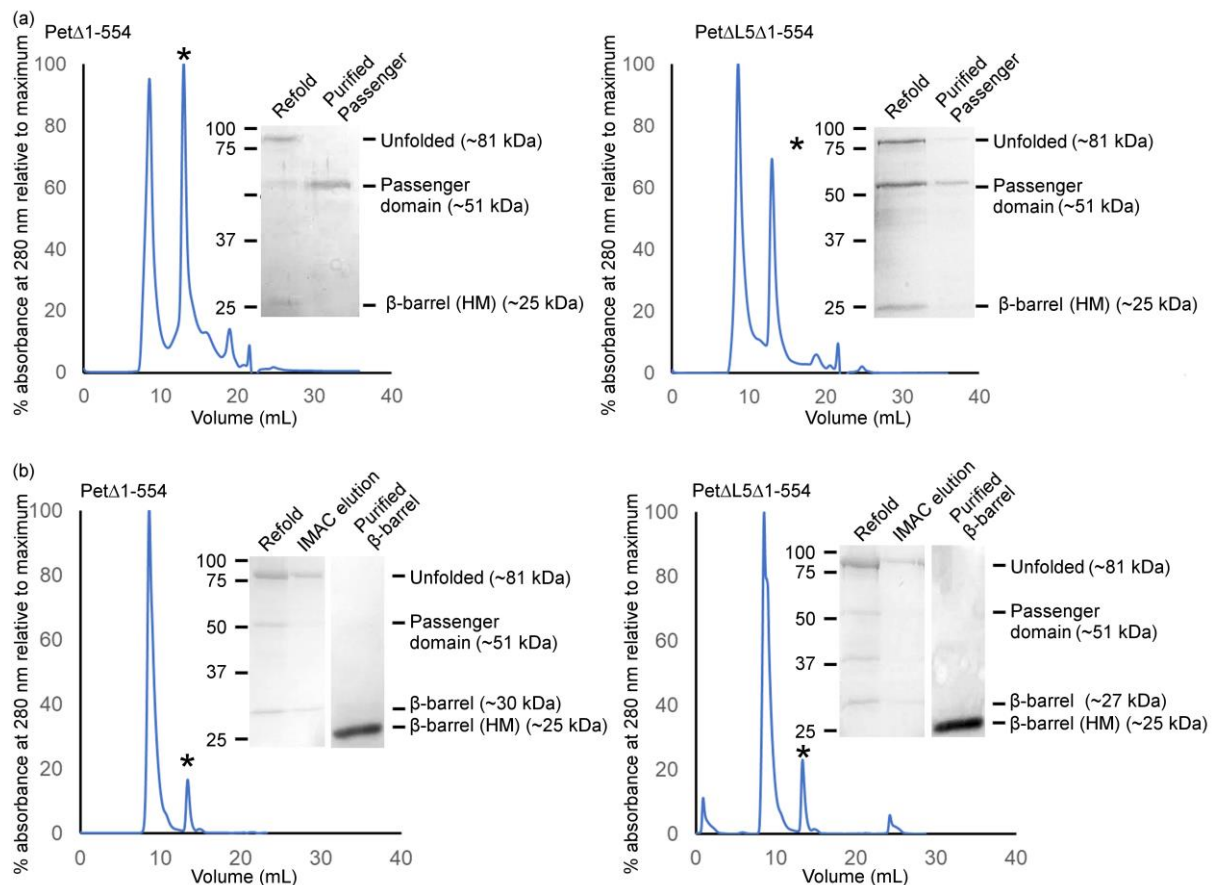

**Supplementary Figure 8 | Purification of  $\text{Pet}^{\Delta 1-554}$  and  $\text{Pet}\Delta\text{L5}\Delta 1-554$ .** (a) Cleaved passenger domains were purified further by gel filtration in LDAO free buffer (\* indicates the passenger domain elution peak), resulting in a batch of protein containing just the ~51 kDa species as analysed by SDS-PAGE and Coomassie staining (insets). (b) Cleaved  $\beta$ -barrel domains were purified further by gel filtration chromatography in buffer containing 0.05% (w/v) LDAO (\* indicates the  $\beta$ -barrel elution peak), resulting in a batch of protein containing just the cleaved ~30 kDa species as analysed by SDS-PAGE and Coomassie staining (inset). Heat modifiability (HM) in the *in vitro*-folded  $\text{Pet}^{\Delta 1-554}$  and  $\text{Pet}\Delta\text{L5}\Delta 1-554$   $\beta$ -barrels was evident by the increased migration of the folded species from samples exposed to SDS at 25 °C.

**Figure 1e Pet**

kDa

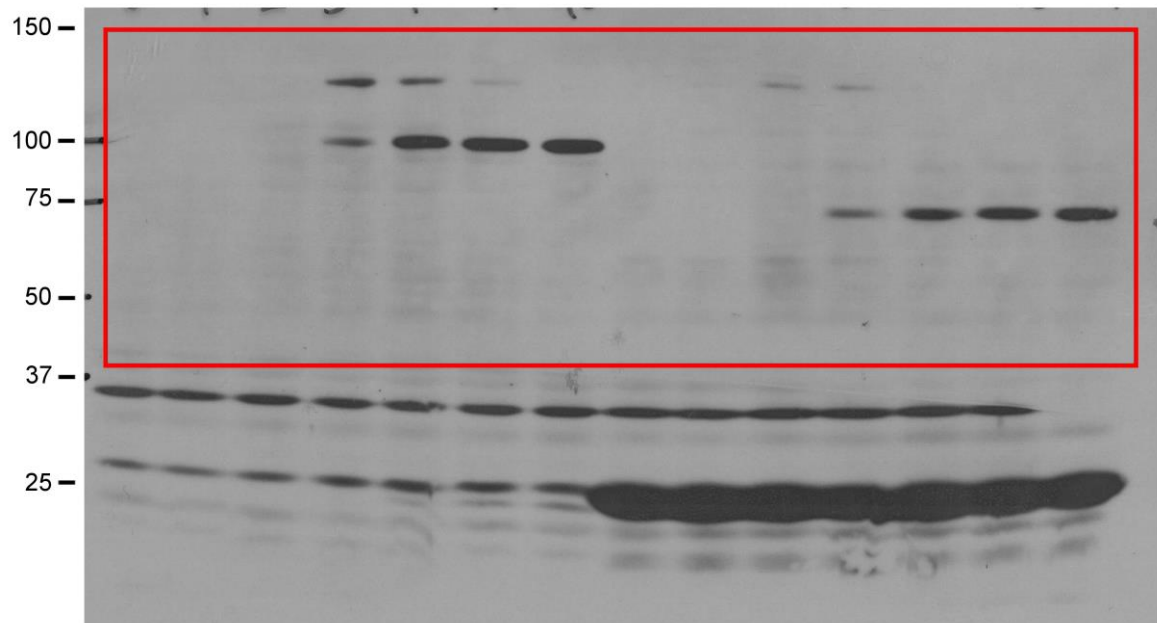

**Figure 1e Pet $\Delta$ L5**

kDa

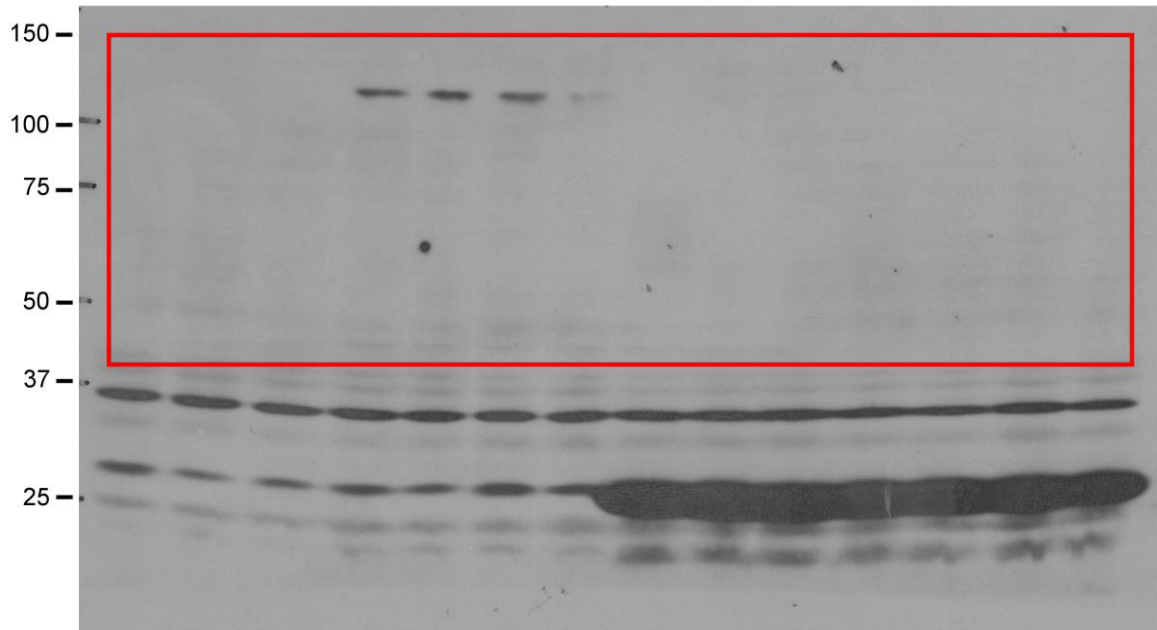

**Figure 1f Pet**

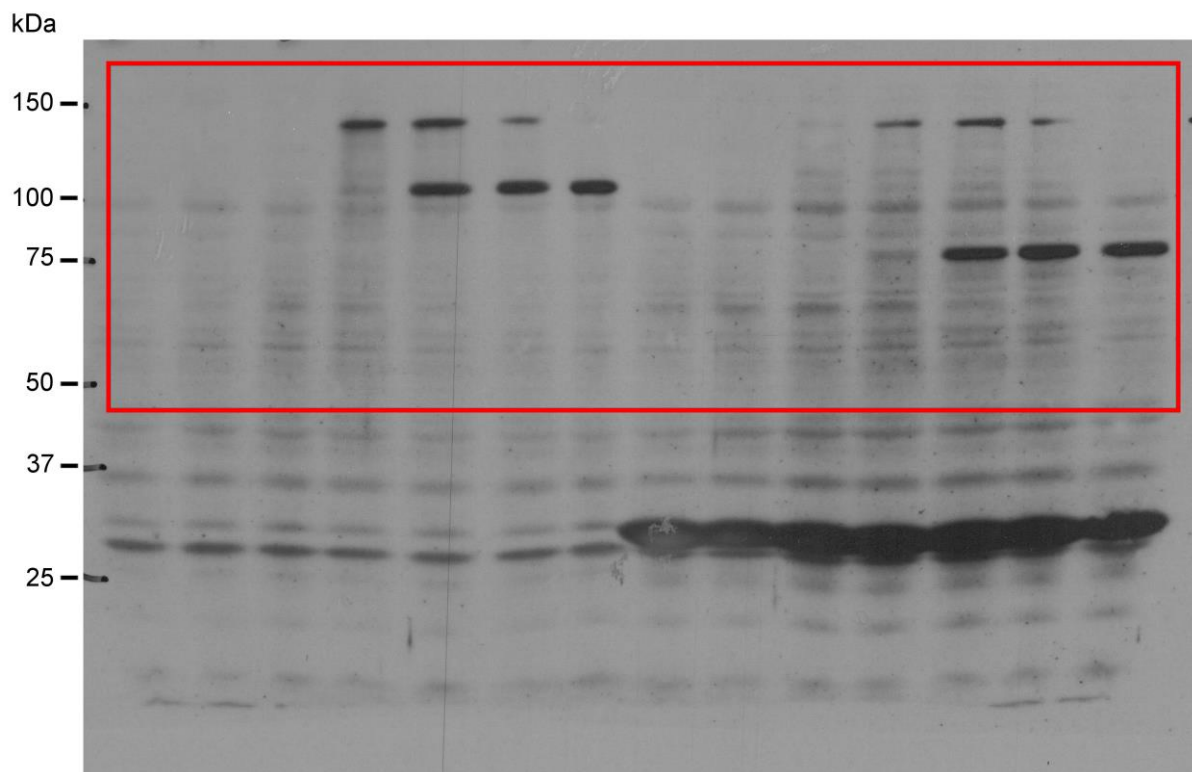

**Figure 1f Pet $\Delta$ L5**

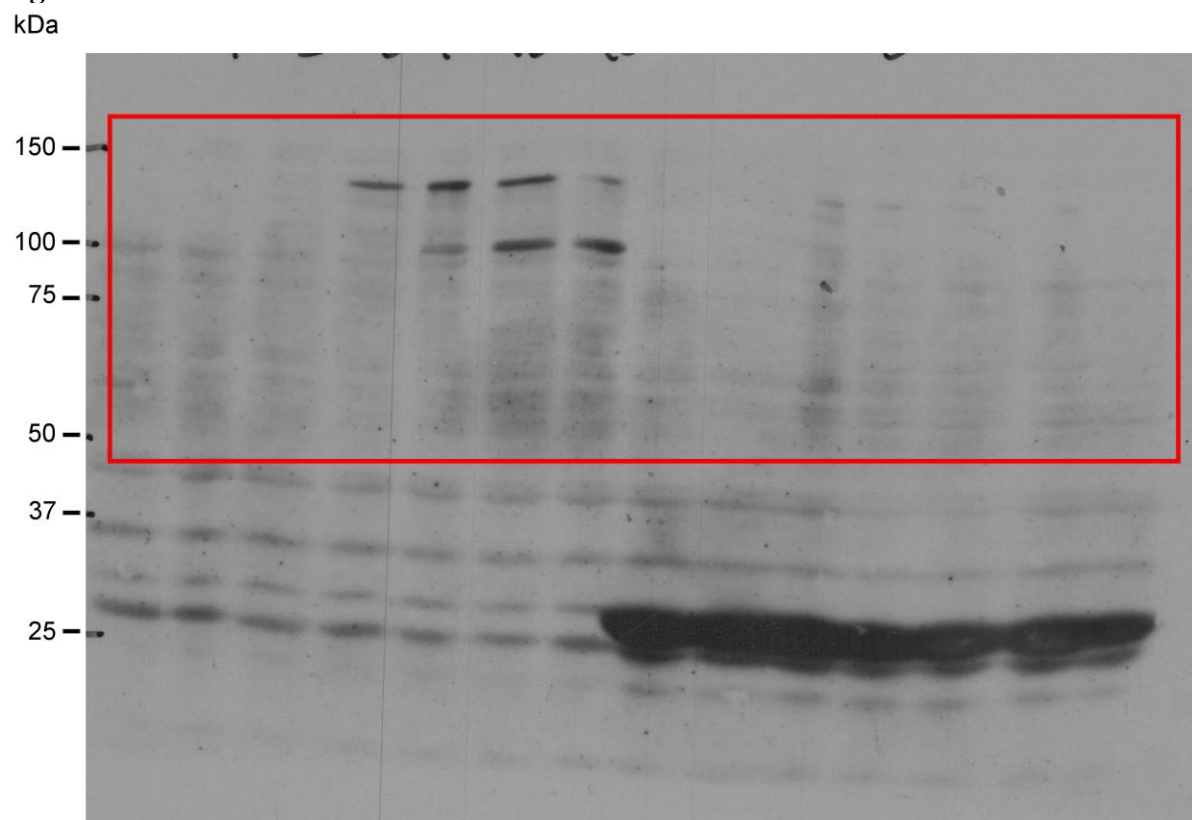



**Figure 1g**

kDa

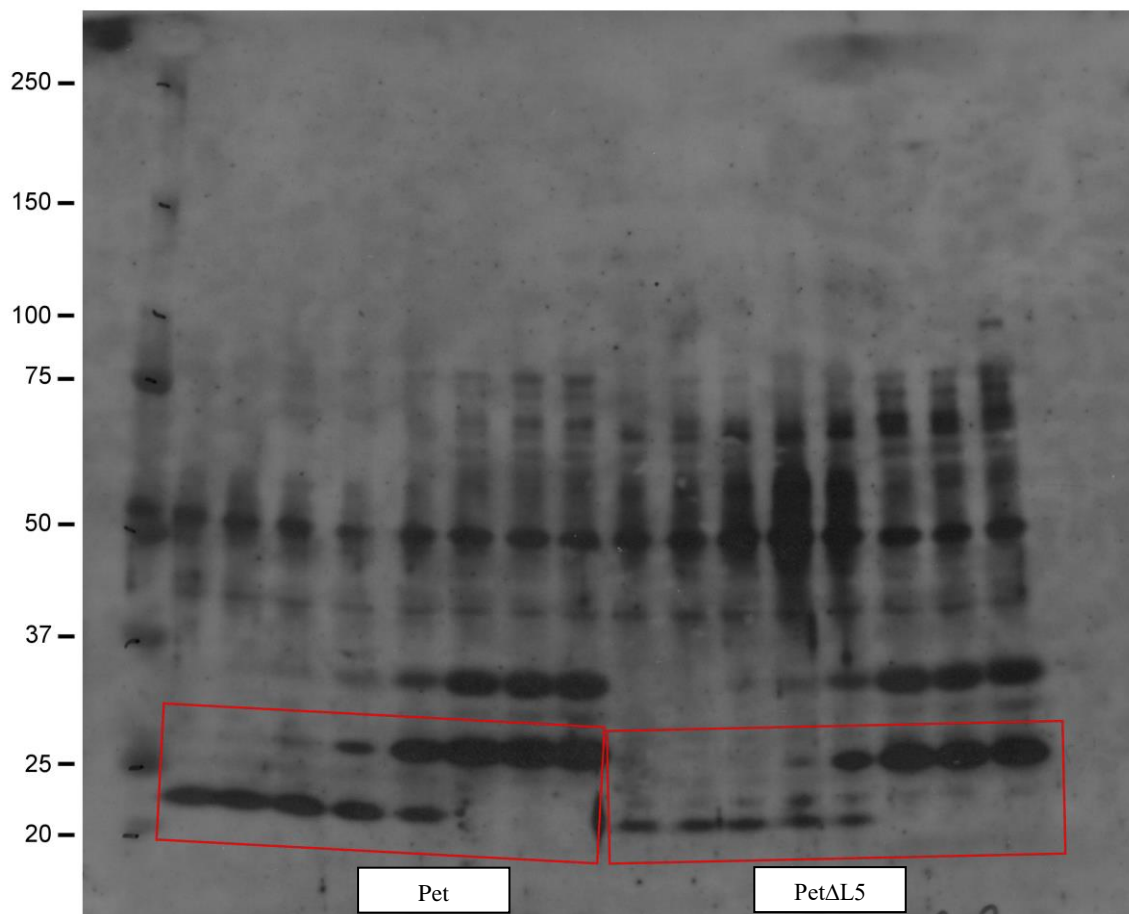

**Figure 2c Pet**

kDa

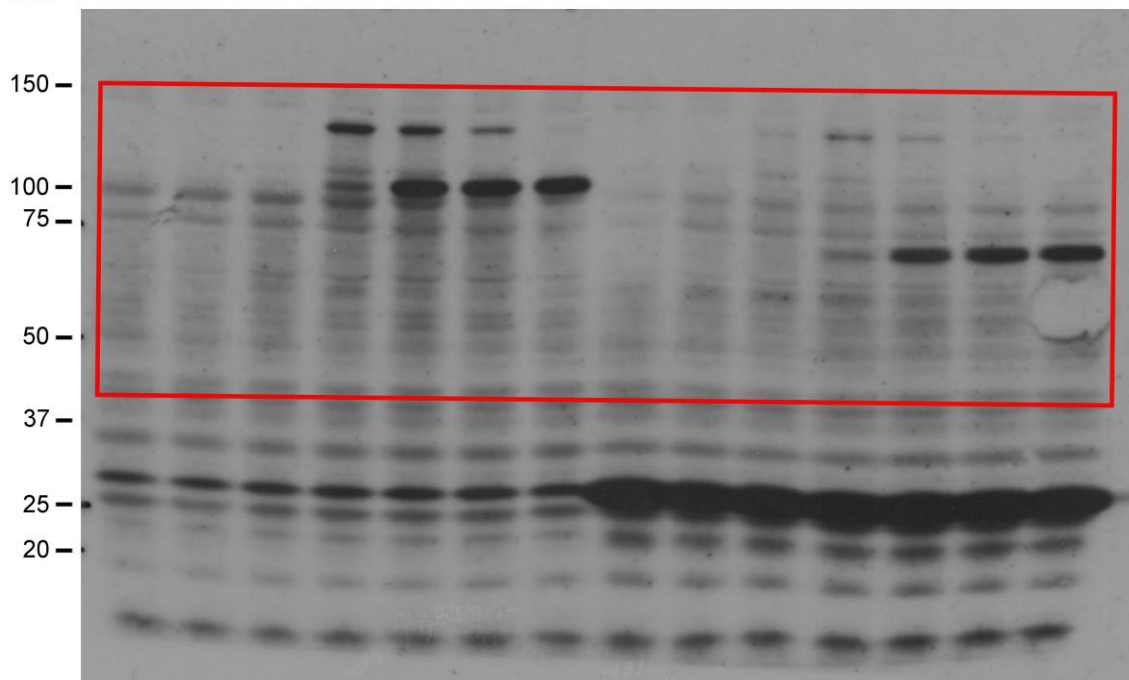



**Figure 2c PetL5 $\beta$ 1/G**

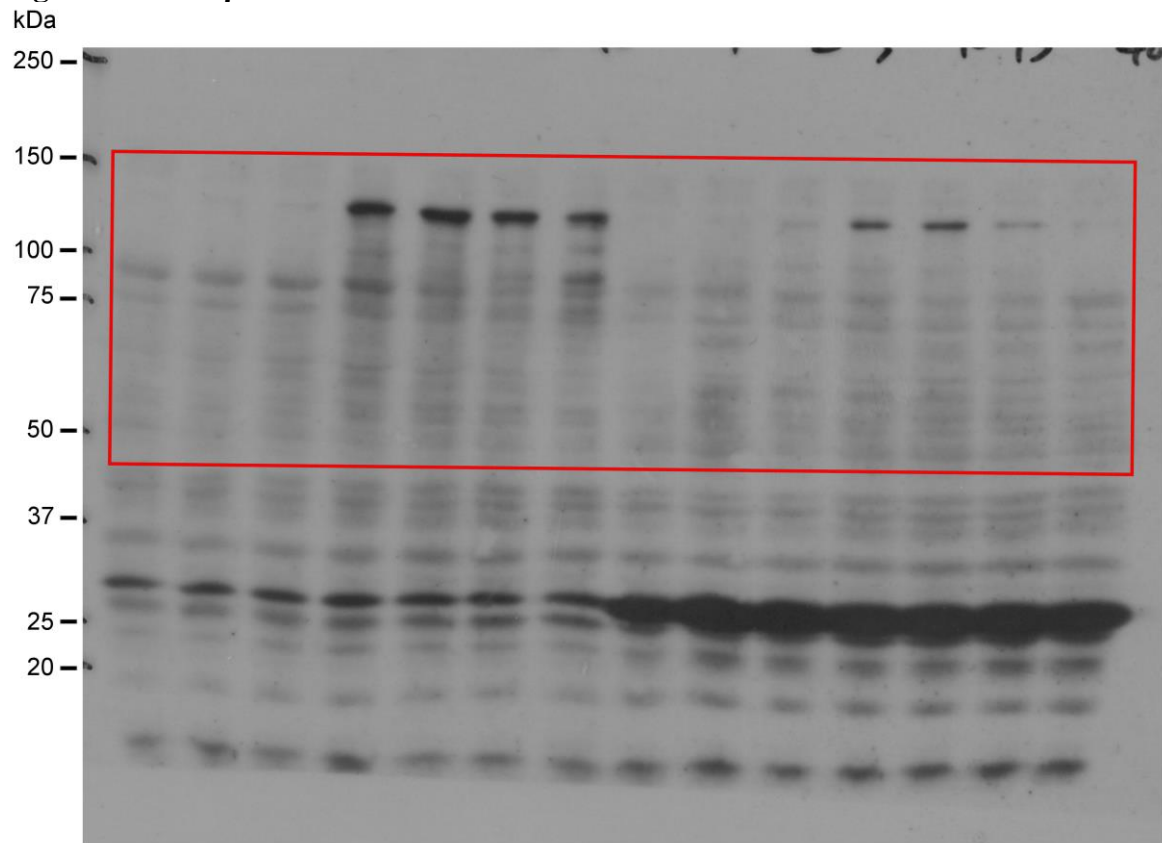

**Figure 2c PetL5 $\beta$ 2/G**

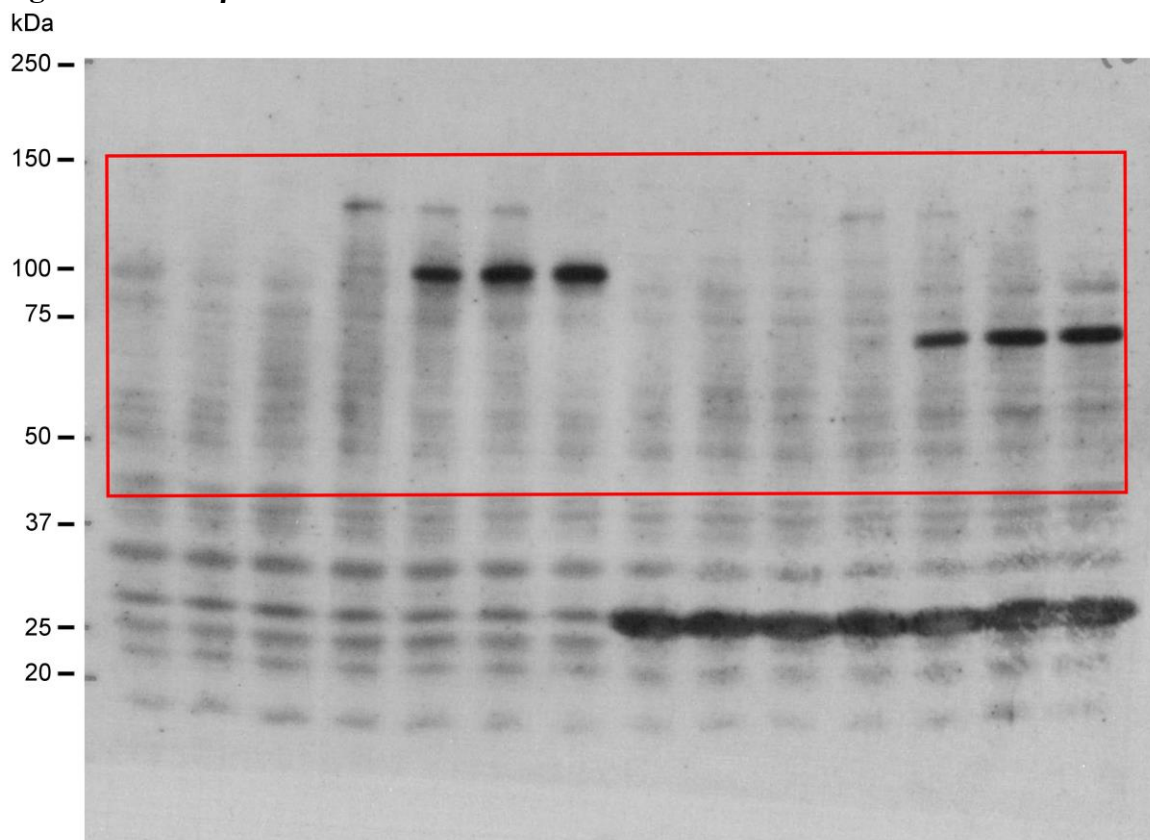

**Figure 2c PetL5Un/G**

kDa

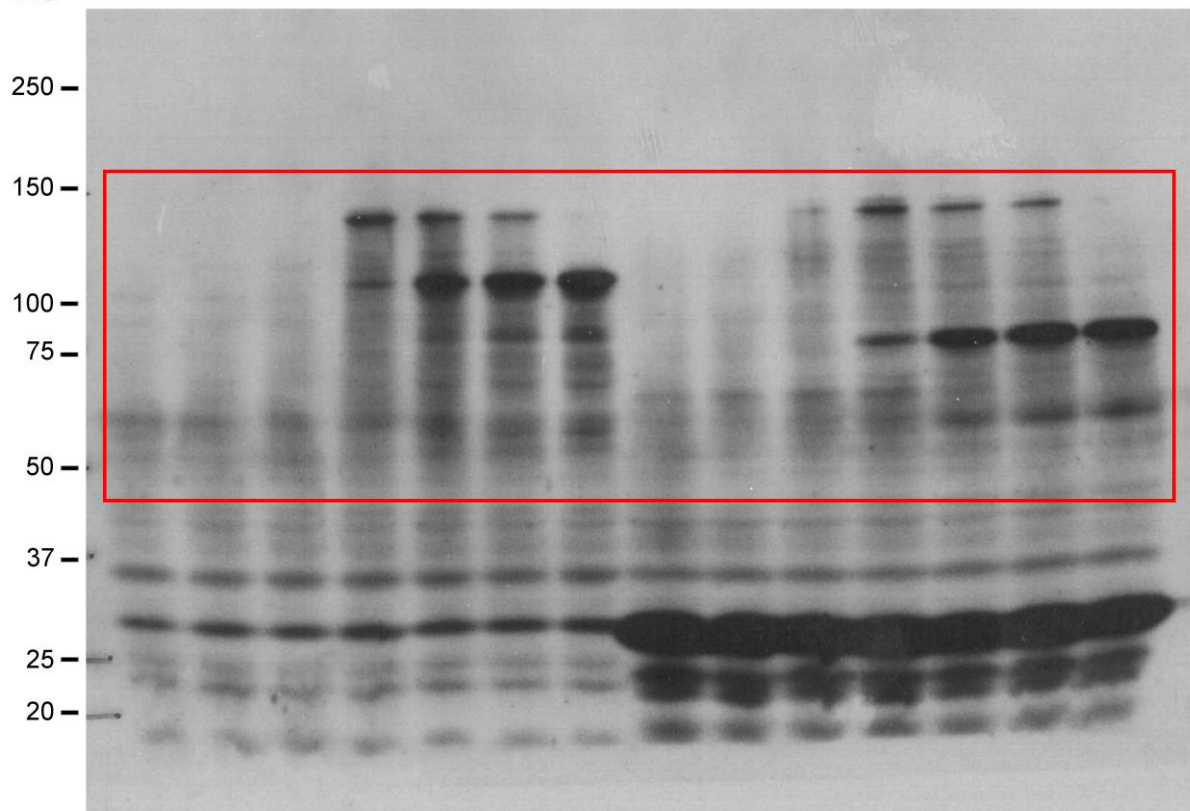

**Figure 2d Pet**

kDa

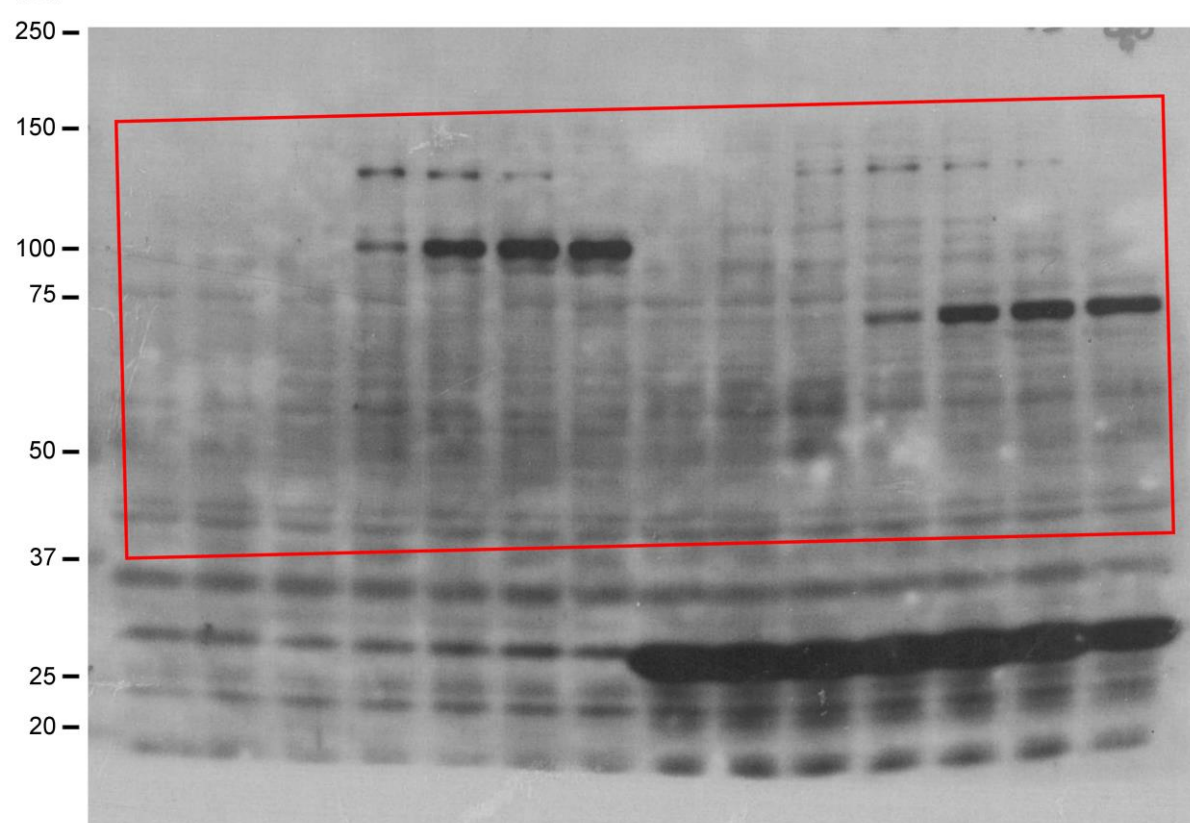

**Figure 2d PetL5OmpF**

kDa

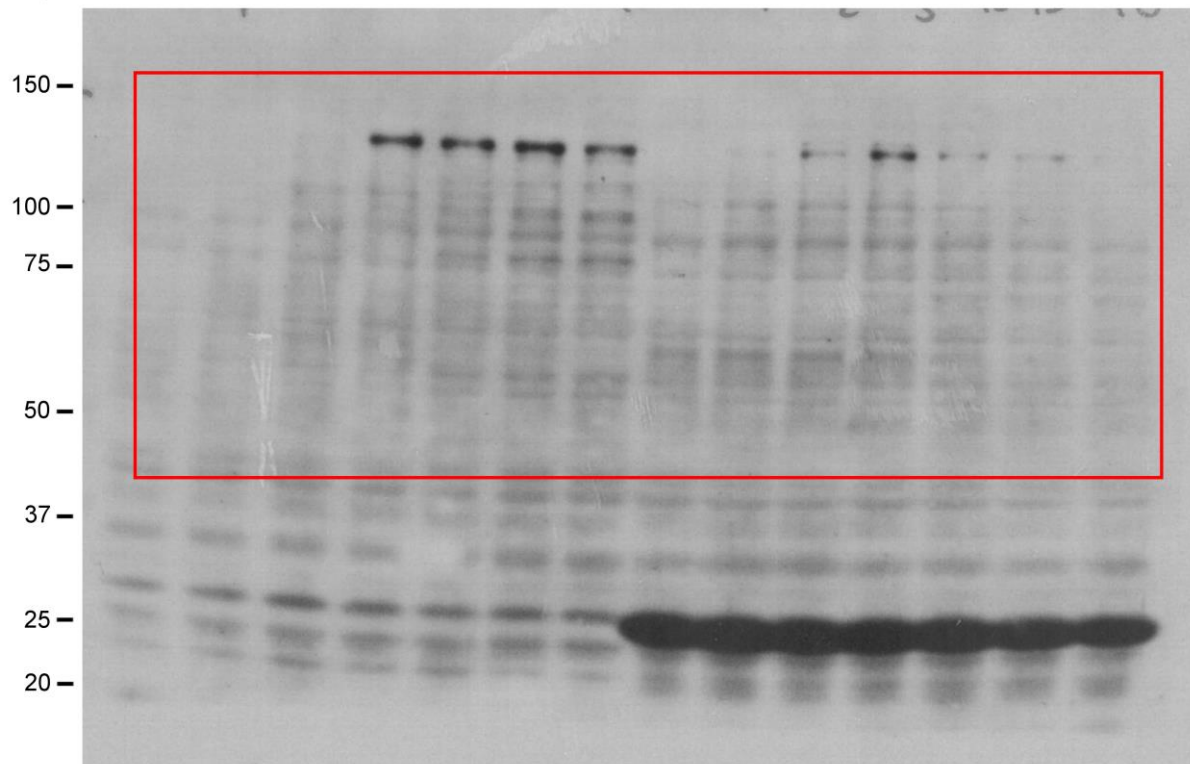

**Figure 2d PetL5FadL**

kDa

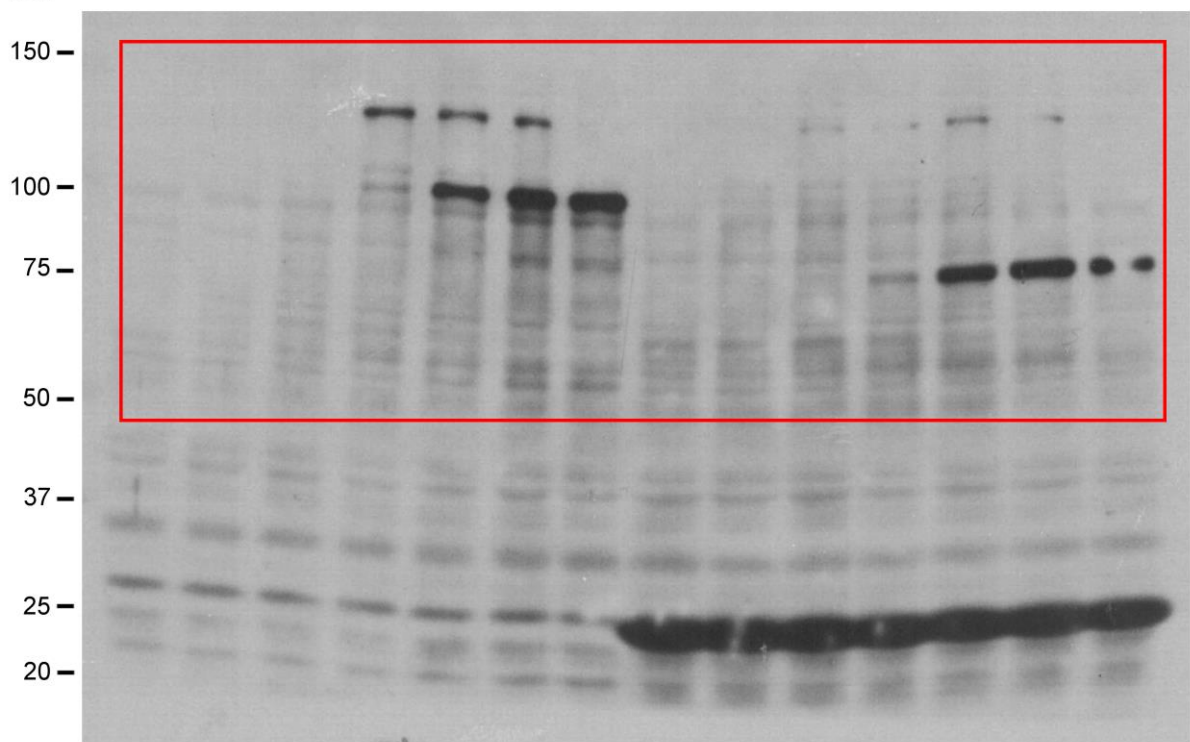

**Figure 2d PetL5β1/P**  
kDa

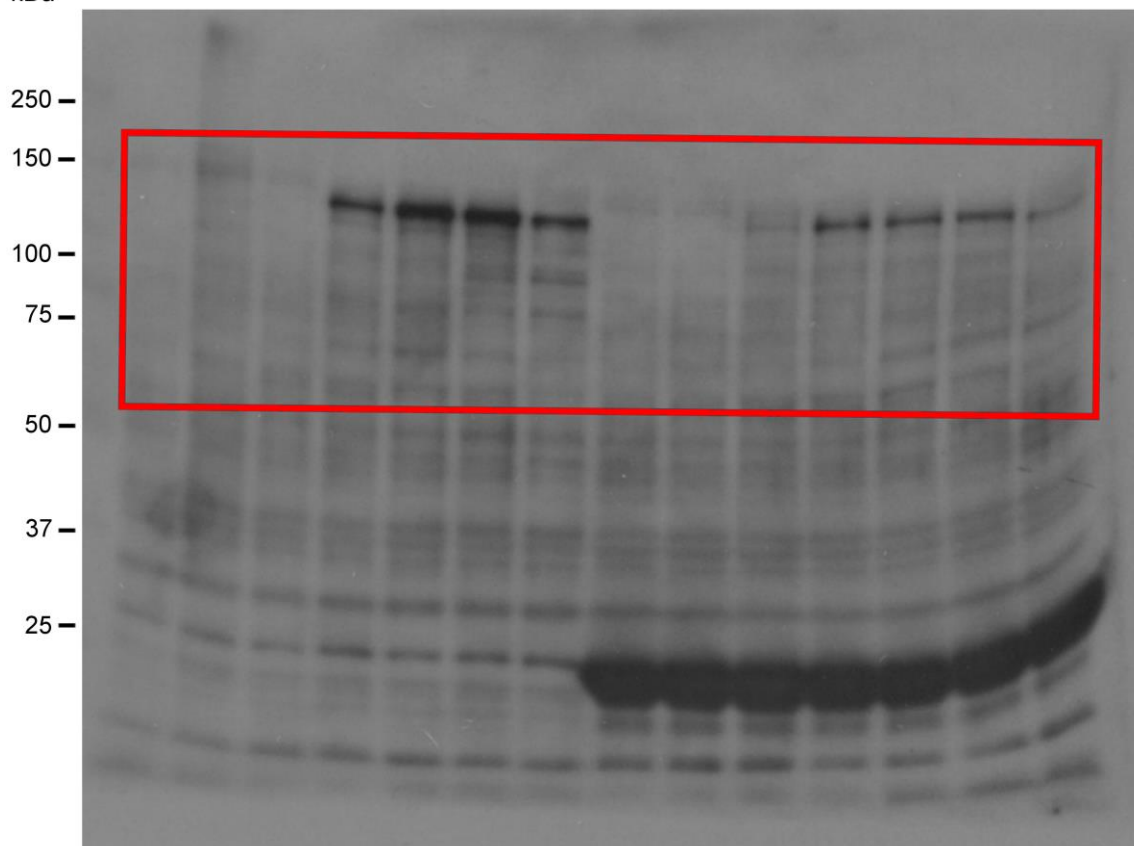

**Figure 3b top**

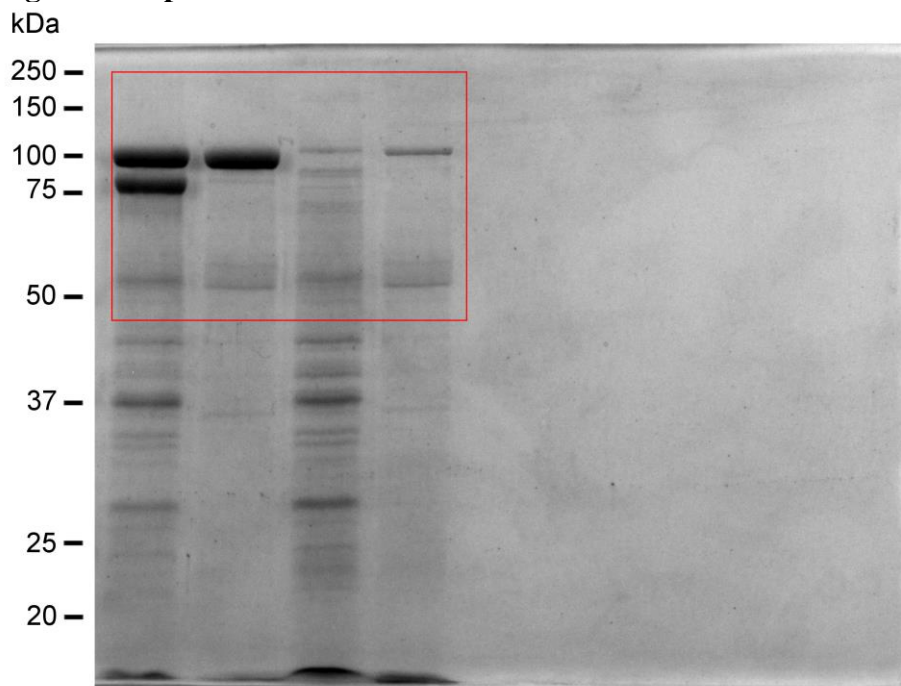



**Figure 3b bottom**

kDa

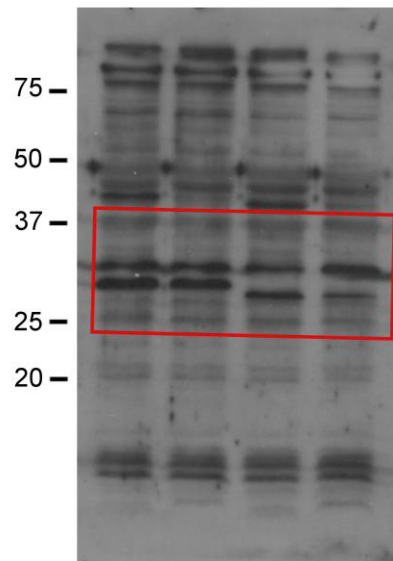

**Figure 4b**

kDa

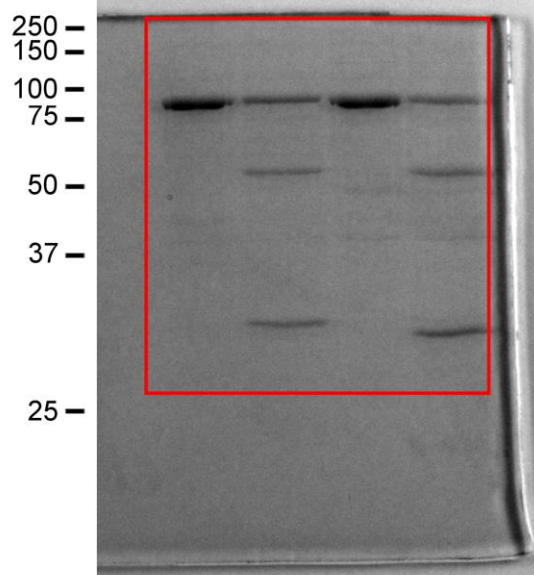

**Figure 4c Passenger antibody (top)**

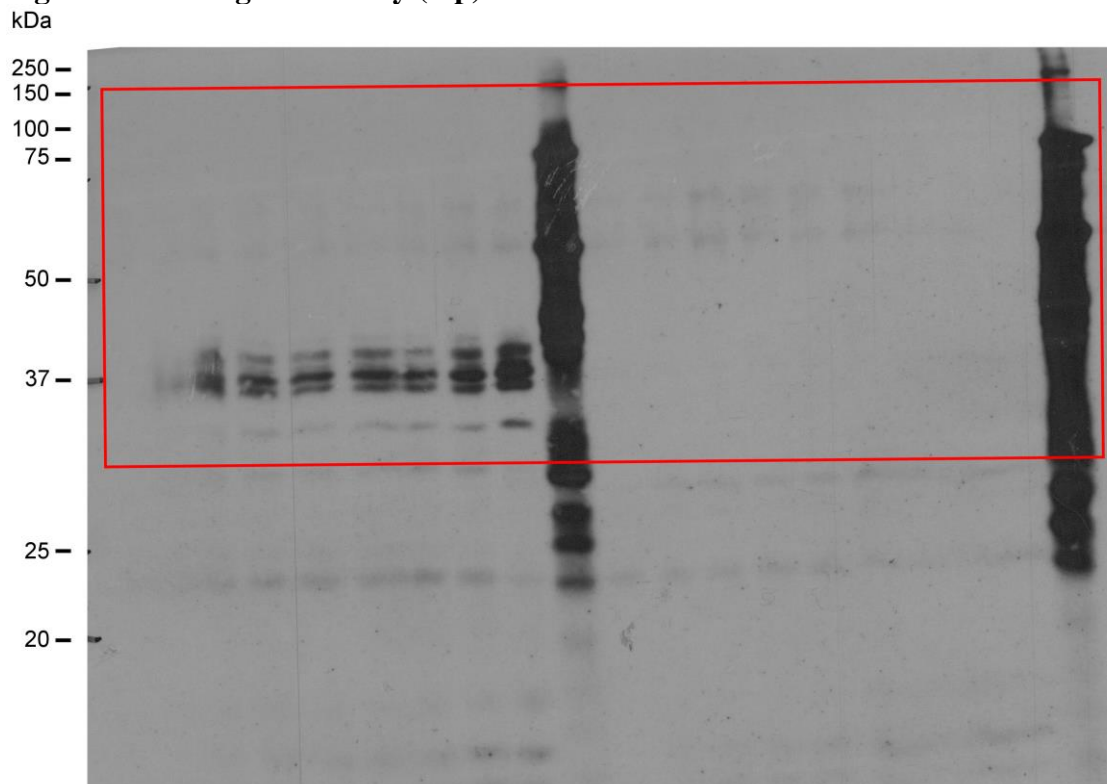

**Figure 4c  $\beta$ -barrel antibody (bottom)**

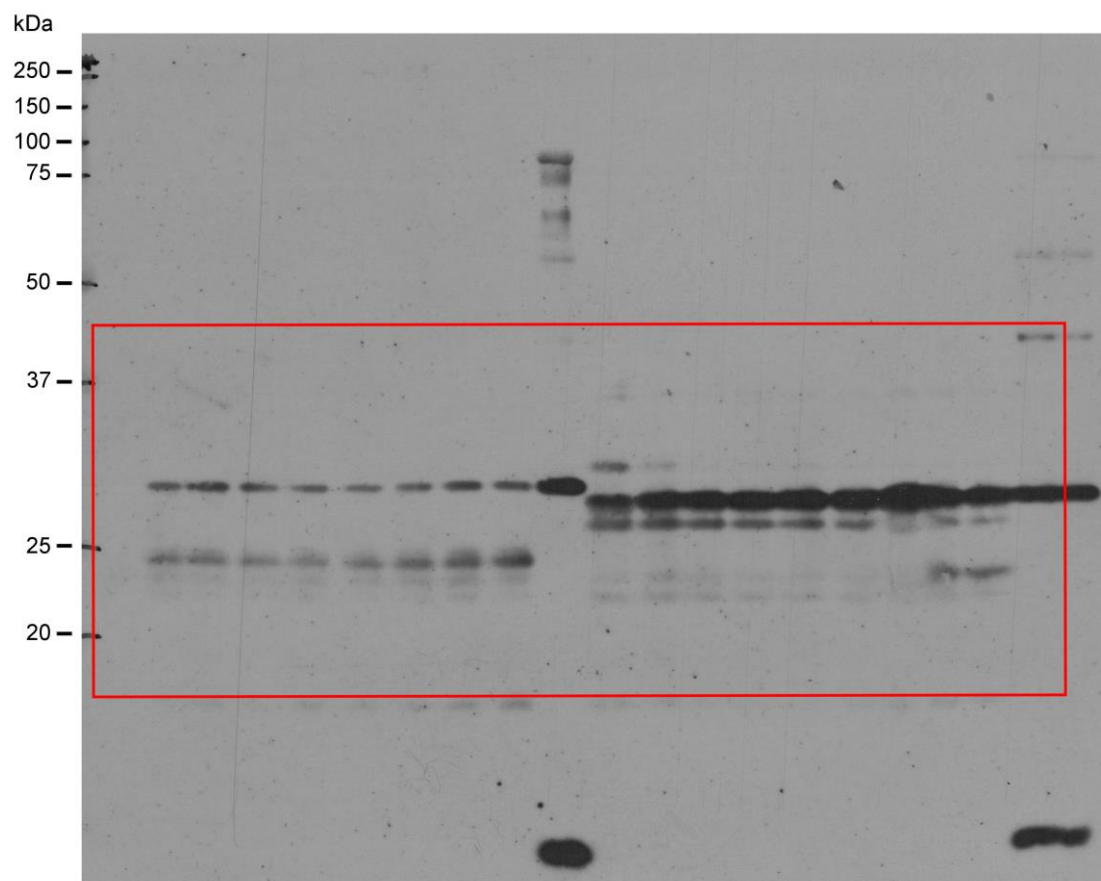



### Supplementary Figure 1a

kDa

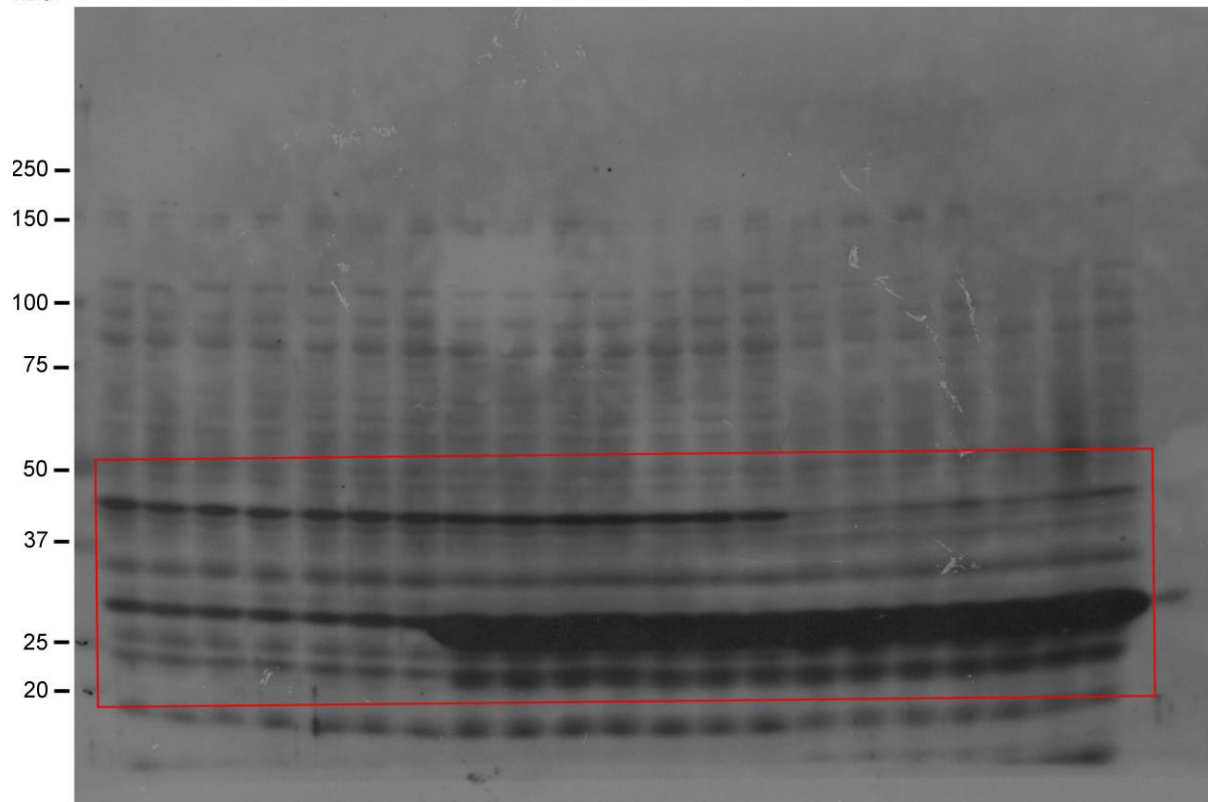

### Supplementary Figure 1b (left panel)

kDa

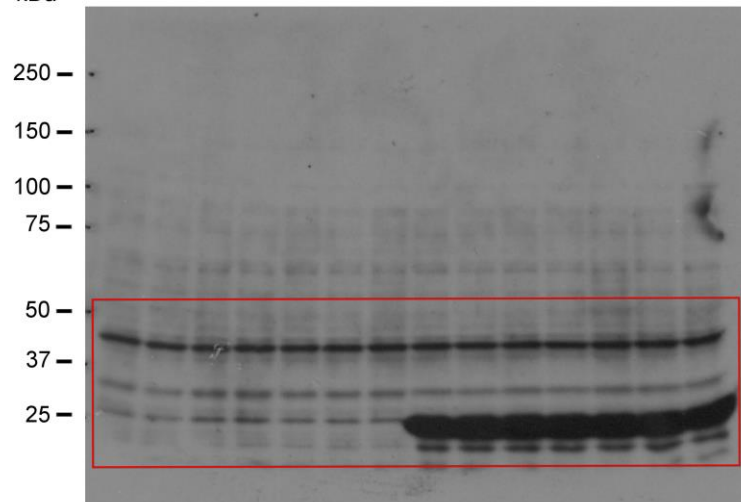

### Supplementary Figure 1b (right panel)

kDa

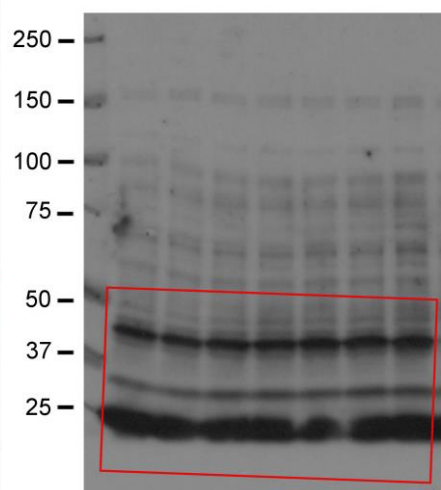

**Supplementary Figure 2b Pet**

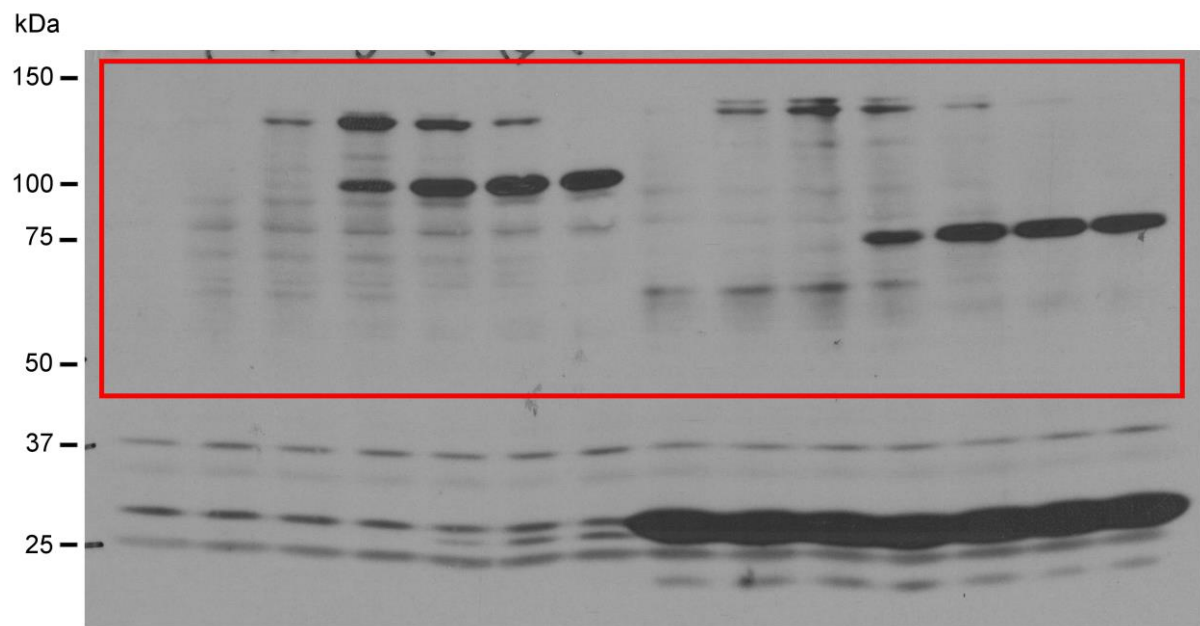

**Supplementary Figure 2b Pet $\Delta$ L3**

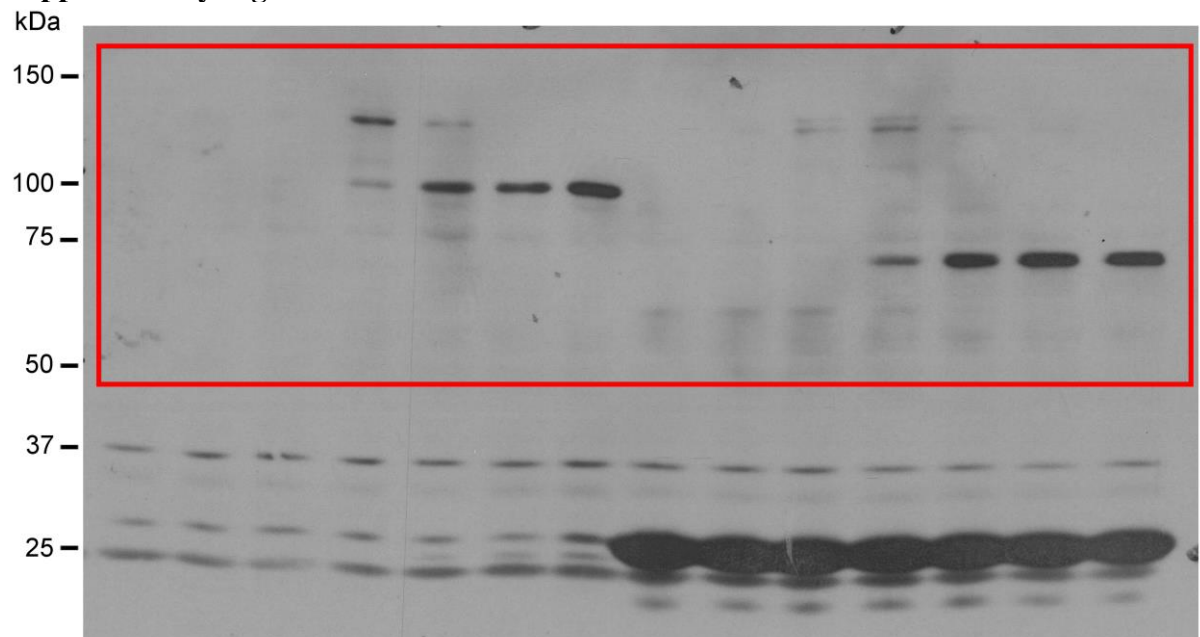

**Supplementary Figure 2b PetΔL4**

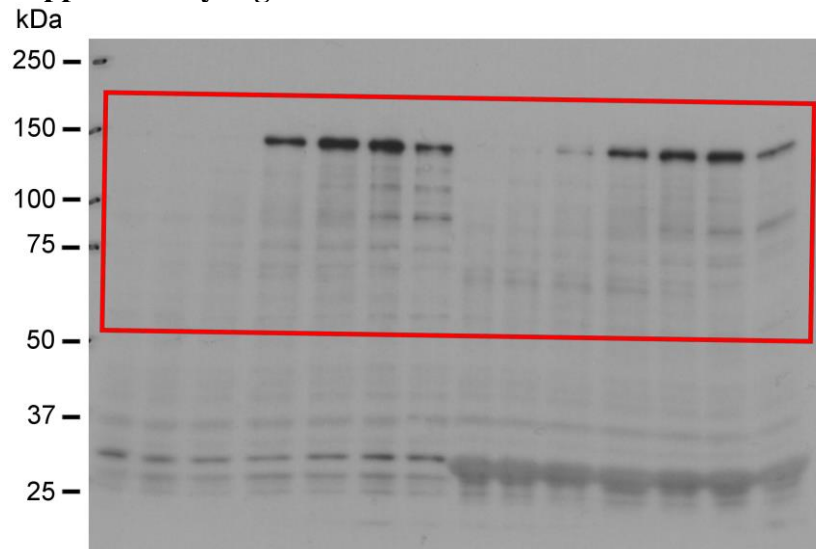

**Supplementary Figure 2c PetΔL4**

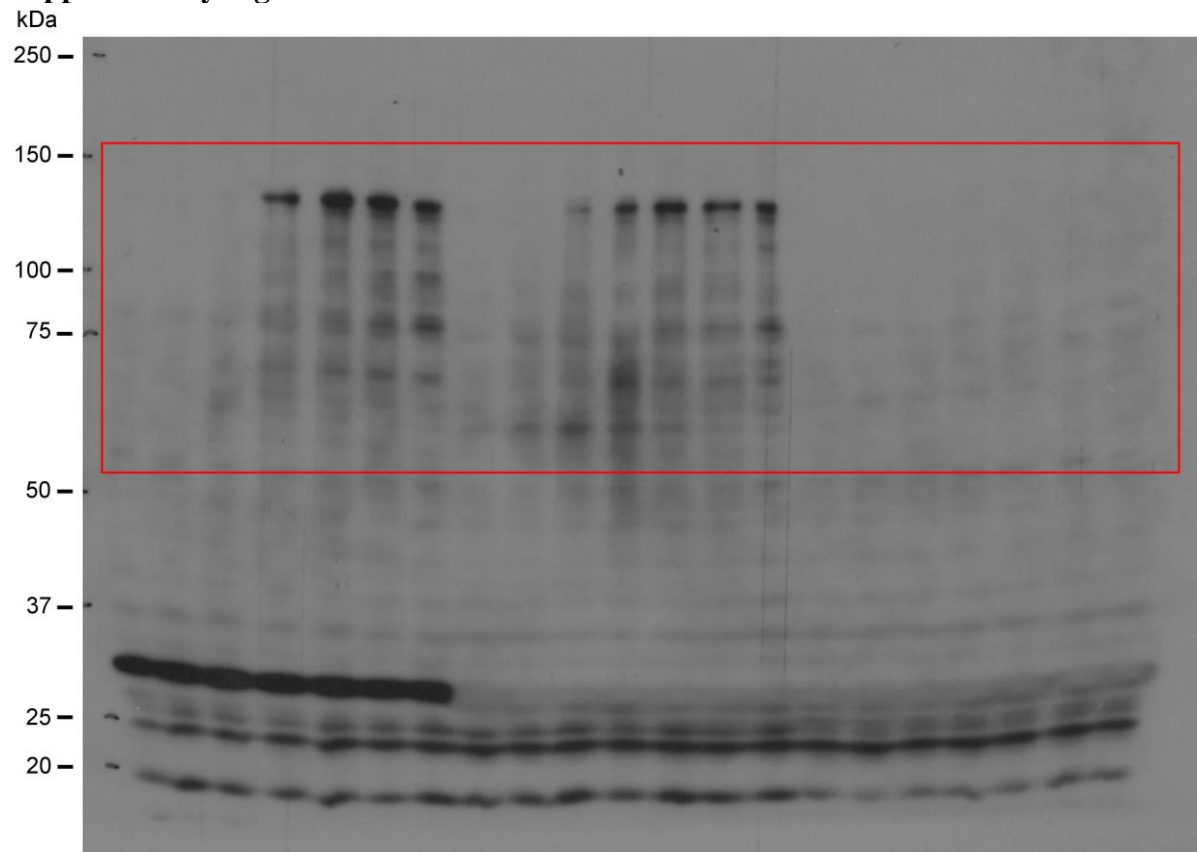

**Supplementary Figure 2e Pet**

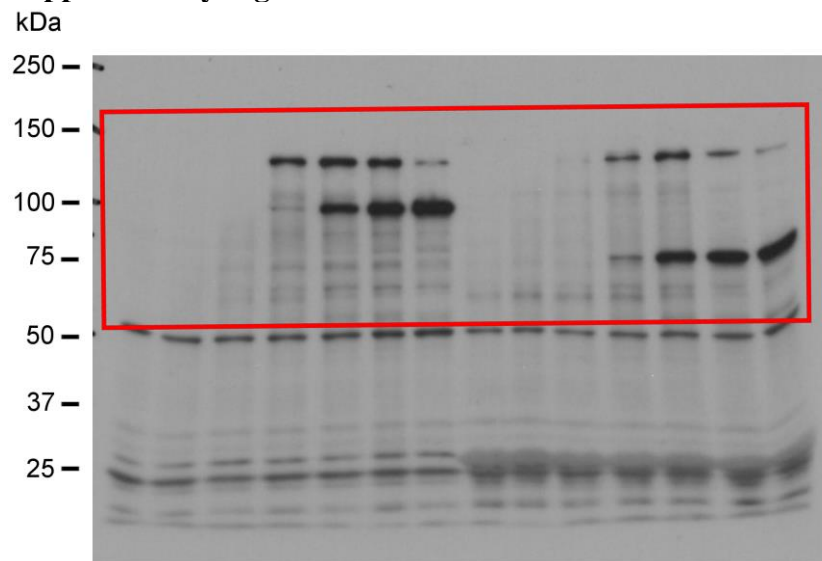

**Supplementary Figure 2e Pet $\Delta$ L4**

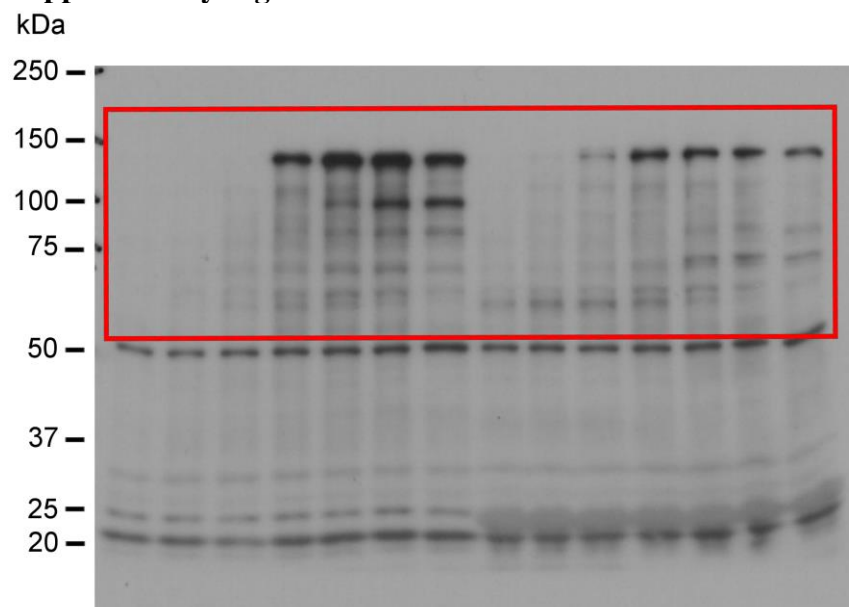

### Supplementary Figure 2g Pet

kDa

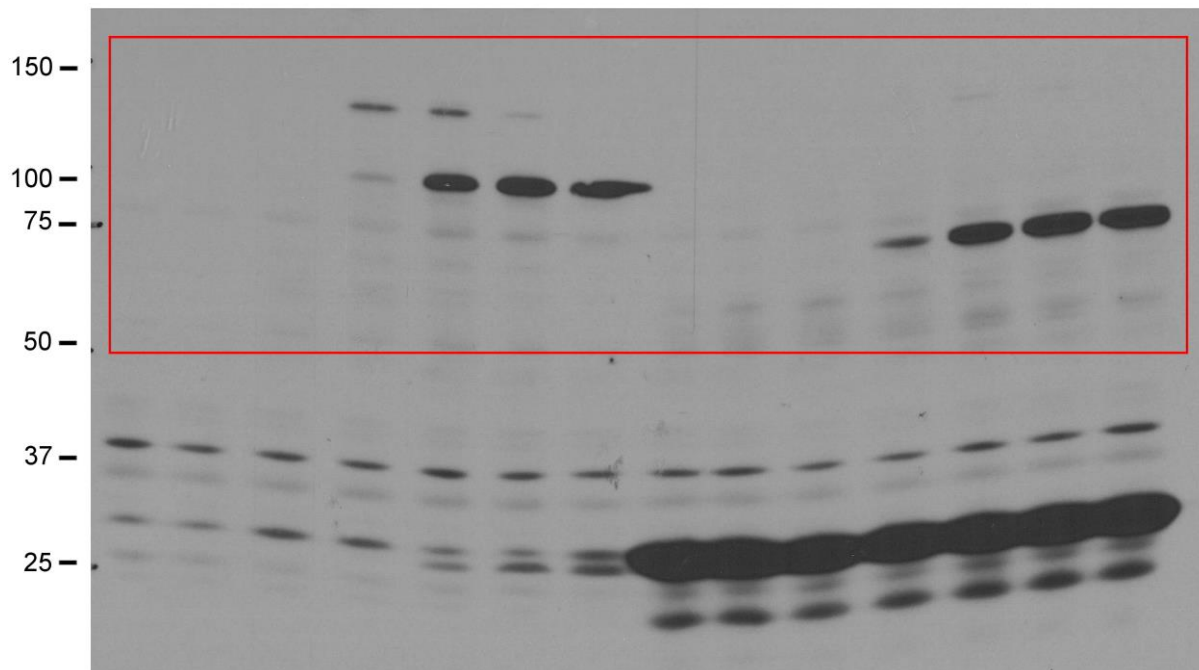

### Supplementary Figure 2g Pet $\Delta$ L4P

kDa

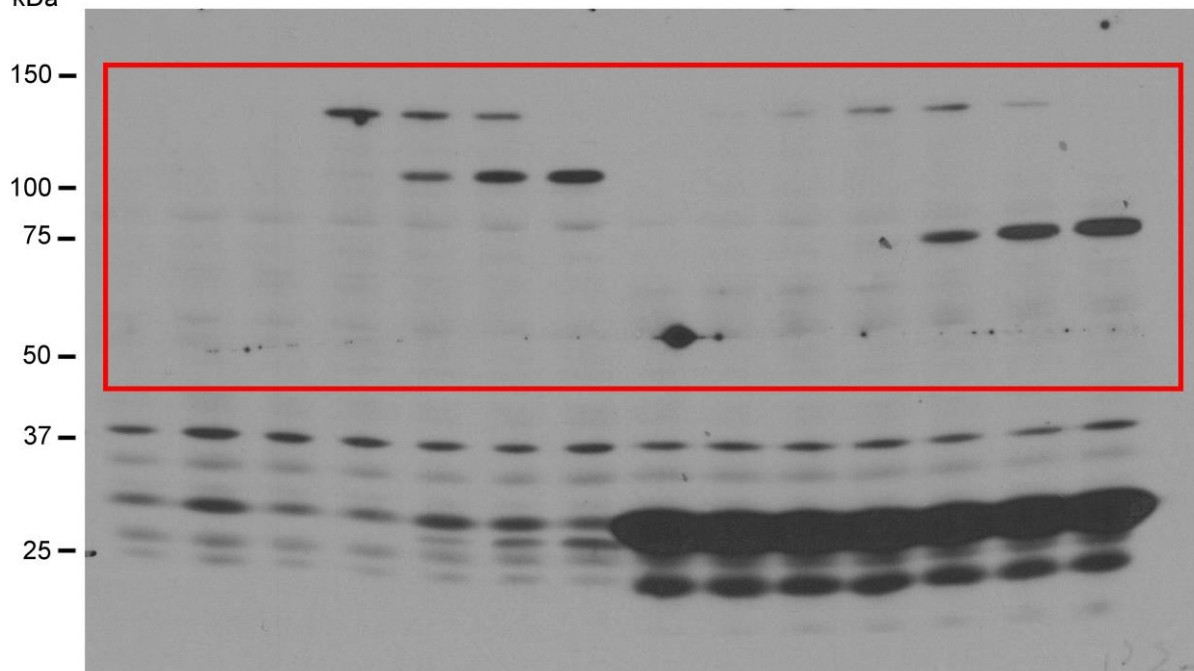

**Supplementary Figure 3 Pet**

kDa

150 —  
100 —  
75 —  
50 —  
37 —  
25 —

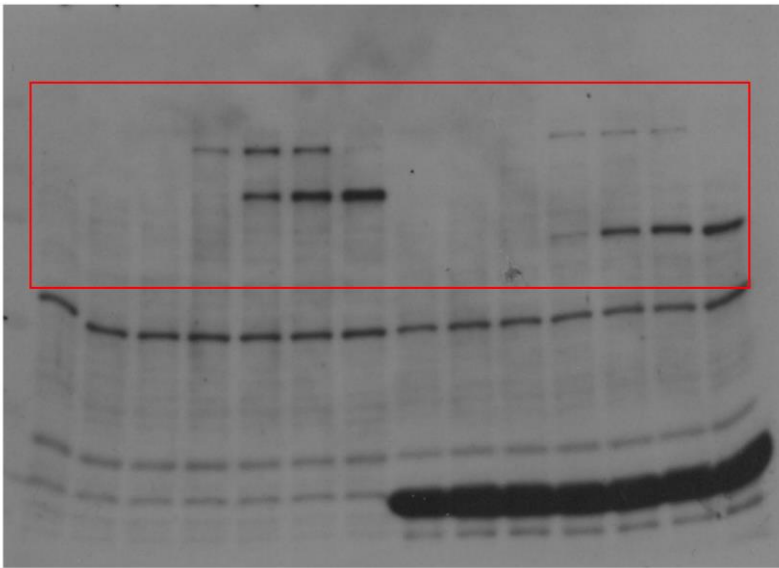

**Supplementary Figure 3 Pet $\Delta$ L5**

kDa

250 —  
150 —  
100 —  
75 —  
50 —  
37 —

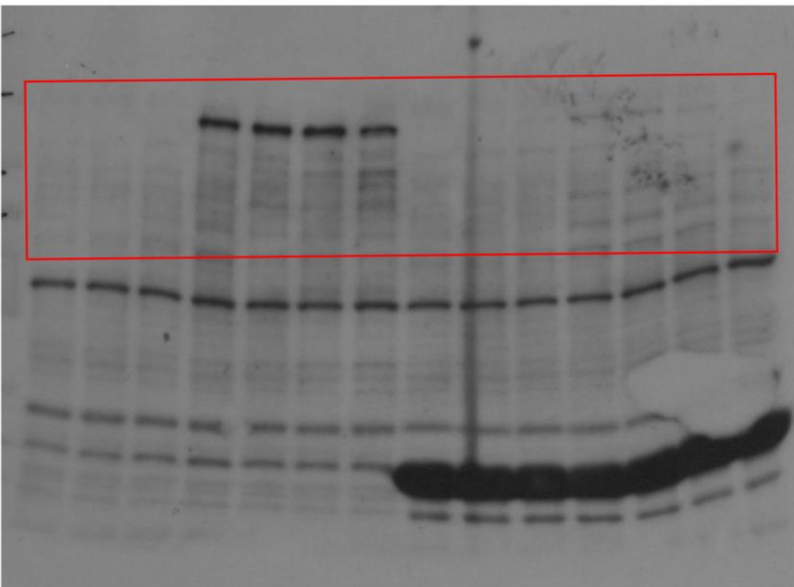



**Supplementary Figure 4b Pet**

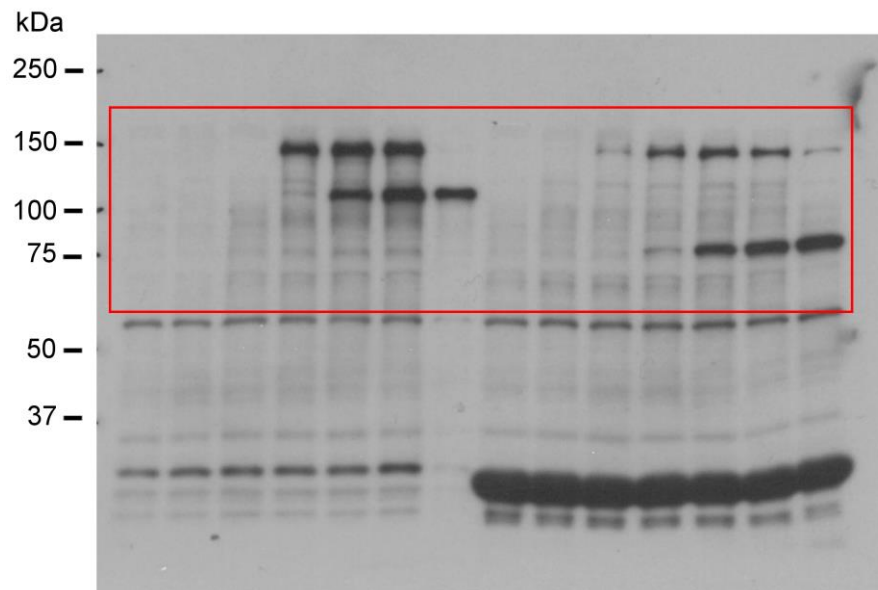

**Supplementary Figure 4b PetL5β1/G**

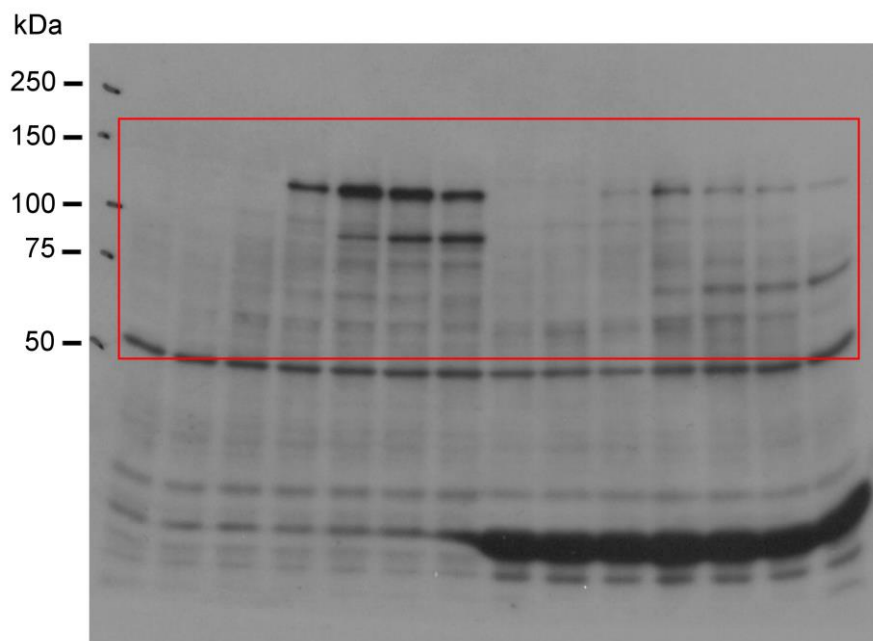

**Supplementary Figure 4b PetL5 $\beta$ 1/P**

kDa

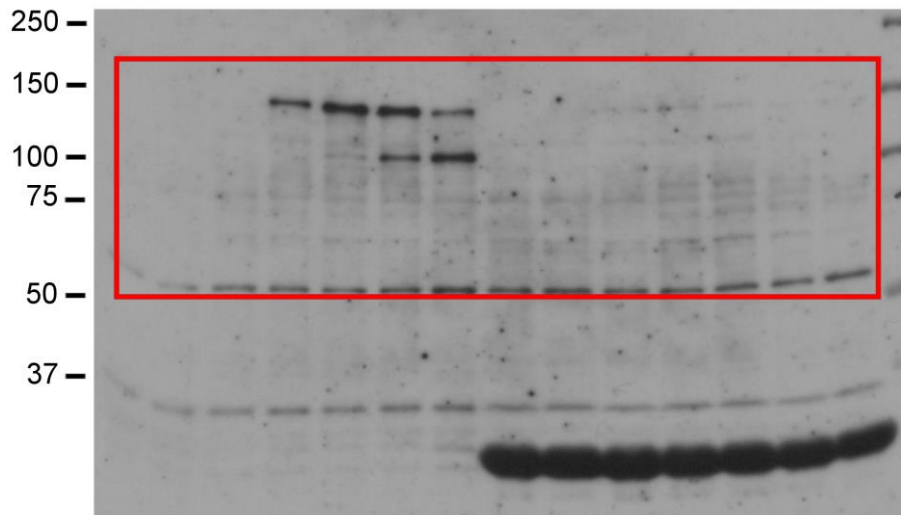

**Supplementary Figure 4b PetL5OmpF**

kDa

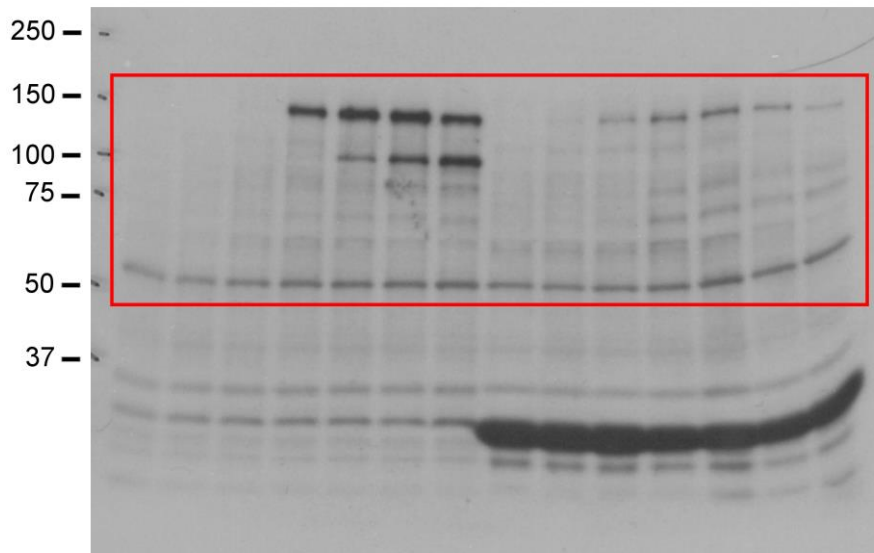

**Supplementary Figure 5b Pet**

kDa

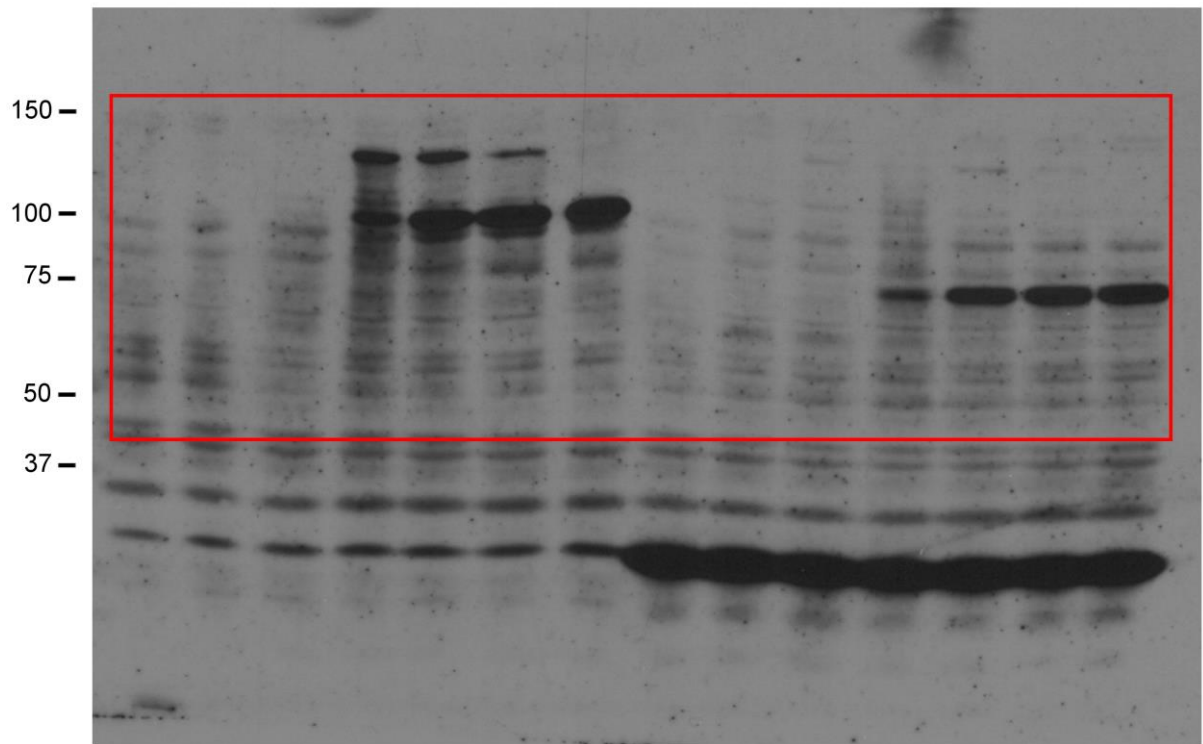

**Supplementary Figure 5b PetL5VLI/N**

kDa

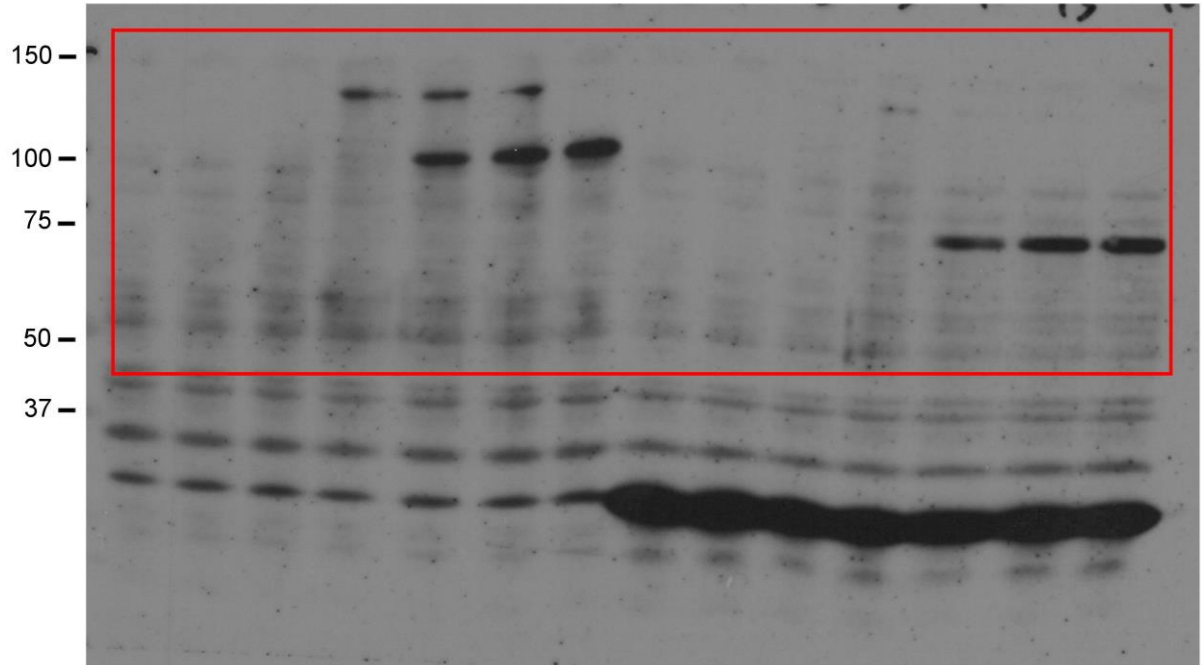

**Supplementary Figure 5b PetL5R/D,E/K**

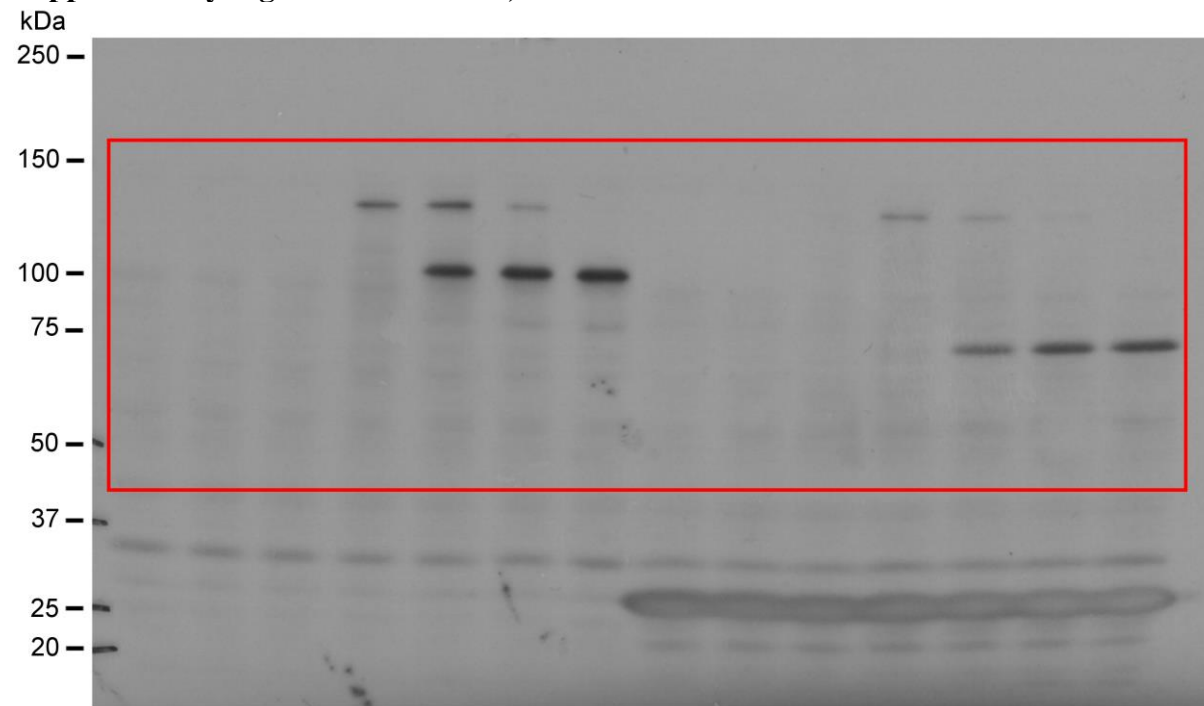

**Supplementary Figure 5b PetL5TD/A**

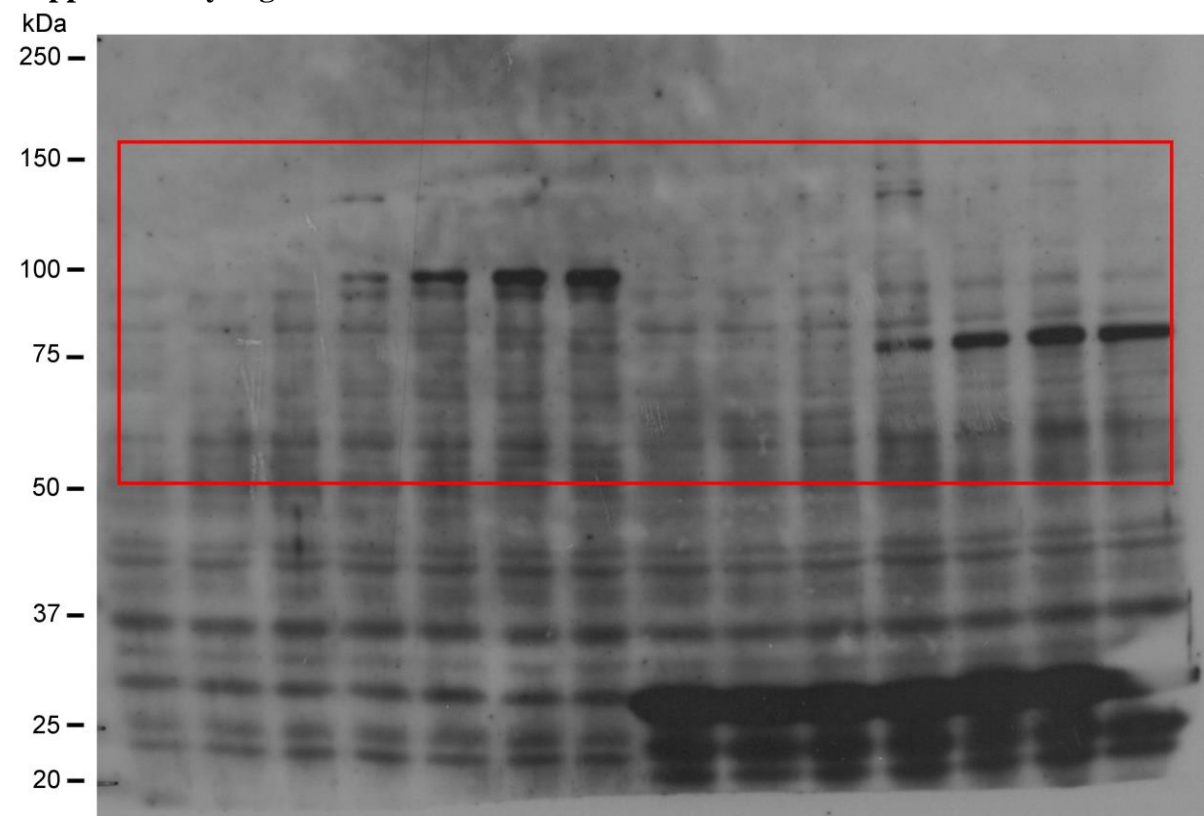

**Supplementary Figure 7d Pet**

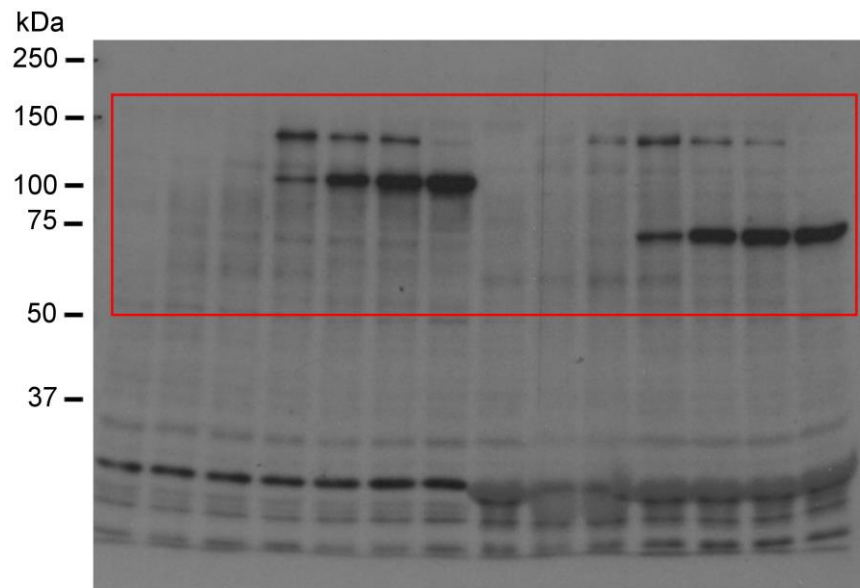

**Supplementary Figure 7d PetL5AIDA-I**

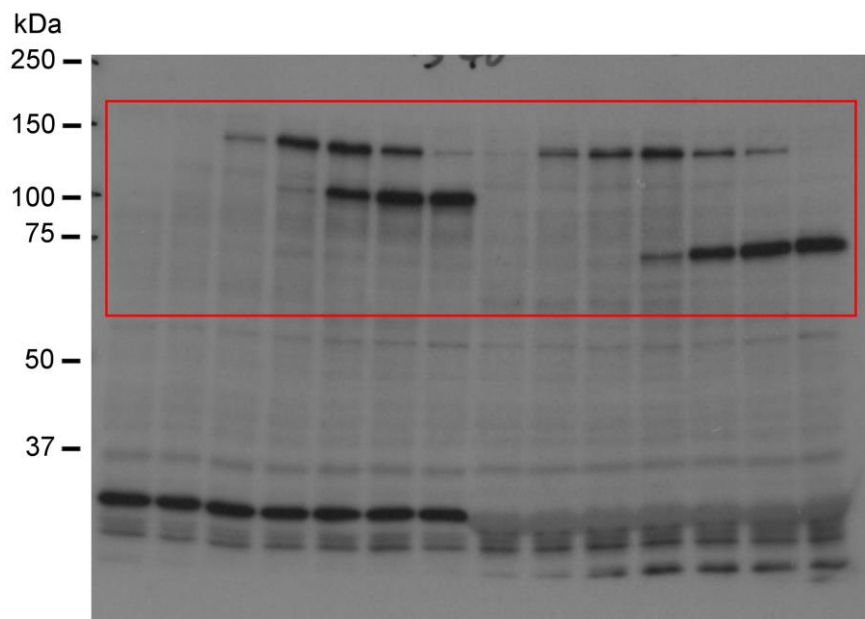



**Supplementary Figure 7d PetL5EstA**

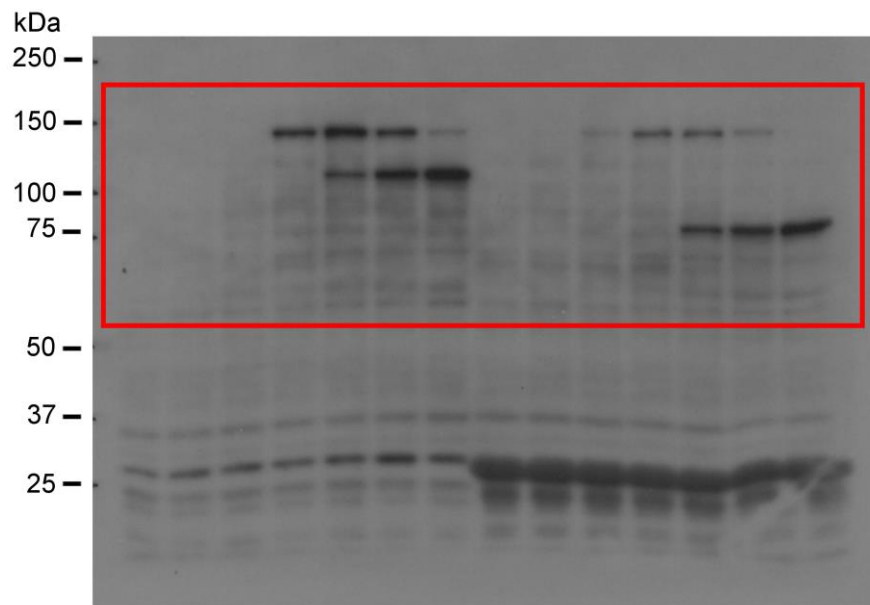

**Supplementary Figure 8a Pet $\Delta$ 1-554 (left)**

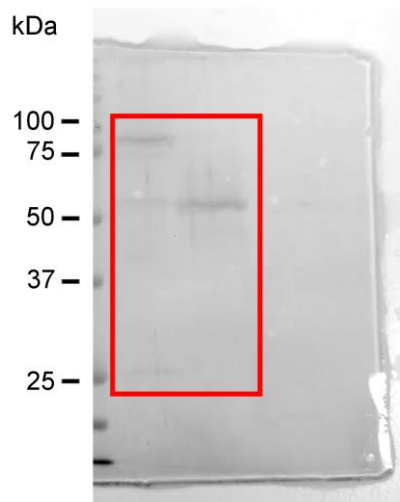

**Pet $\Delta$ L5 $\Delta$ 1-554 (right)**

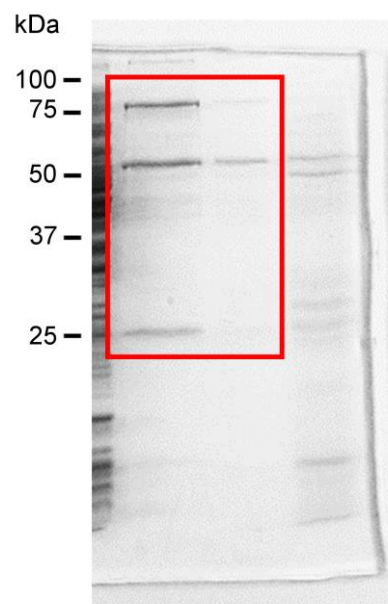

**Supplementary Figure 8b Pet $\Delta$ 1-554 (left)**

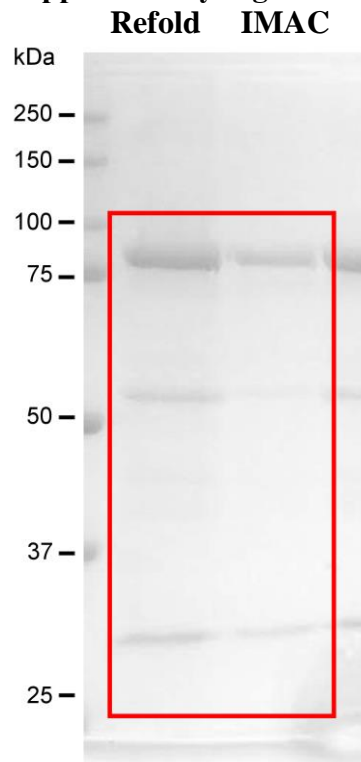

**Purified  $\beta$ -Barrel**

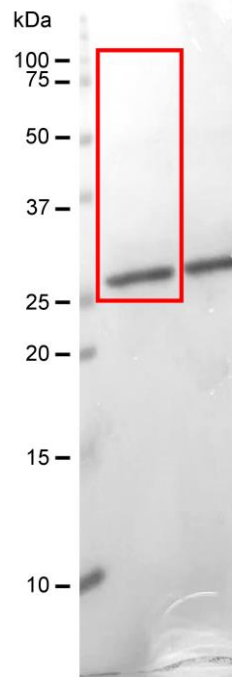

**Supplementary Figure 8b Pet $\Delta$ L5 $\Delta$ 1-554 (right)**

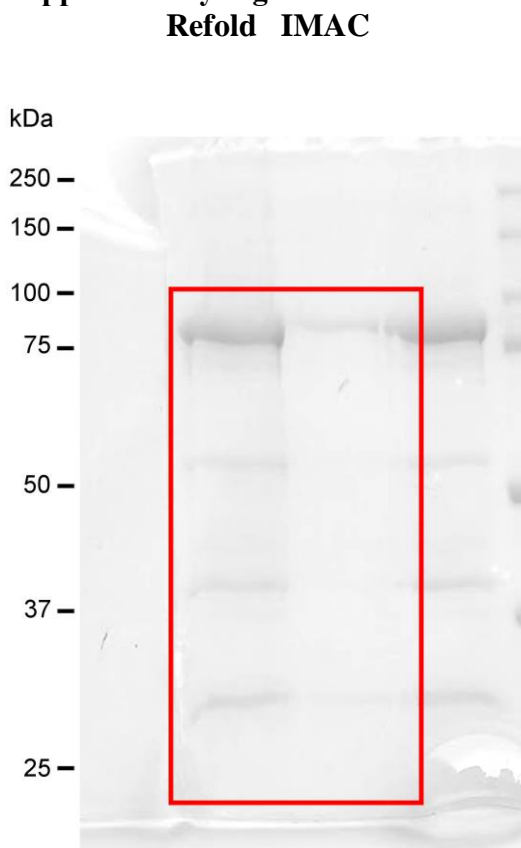

**Purified  $\beta$ -Barrel**

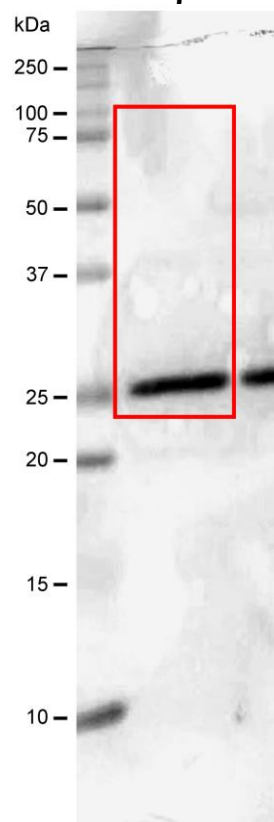

**Supplementary Figure 9 | Raw image files.** The raw image files of the cropped immunoblots and Coomassie-stained gels displayed in the Figures and Supplementary Figures. Sizes (in kDa) are indicated on the left. A red box is used to indicate the portion of the raw image that was cropped and displayed in the indicated Figures and Supplementary Figures.

**Supplementary Table 1. Strains and plasmids used in this study**

| Strain/Plasmid                             | Relevant description                                                                                                                                                                                                                                                                                                                                                                   | Reference                    |
|--------------------------------------------|----------------------------------------------------------------------------------------------------------------------------------------------------------------------------------------------------------------------------------------------------------------------------------------------------------------------------------------------------------------------------------------|------------------------------|
| <i>E. coli</i> TOP10                       | F– <i>mcrA</i> $\Delta(mrr-hsdRMS-mcrBC)$ $\Phi 80lacZ\Delta M15$<br>$\Delta lacX74$ <i>recA1</i> <i>araD139</i> $\Delta(ara\ leu)$ 7697 <i>galU</i> <i>galK</i><br><i>rpsL</i> (StrR) <i>endA1</i> <i>nupG</i>                                                                                                                                                                        | Invitrogen                   |
| <i>E. coli</i> BW25113                     | <i>lacI<sup>a</sup></i> <i>rrnB<sub>T14</sub></i> $\Delta lacZ_{wJ16}$ <i>hsdR514</i> $\Delta araBAD_{AH33}$ $\Delta rhaBAD_{LD78}$                                                                                                                                                                                                                                                    | <sup>2</sup>                 |
| <i>E. coli</i> BW25113<br><i>ompT::kan</i> | An in-frame <i>ompT</i> knock-out mutant of <i>E. coli</i> BW25113                                                                                                                                                                                                                                                                                                                     | <sup>2</sup>                 |
| <i>E. coli</i> BL21<br>(DE3)               | F– <i>ompT</i> <i>hsdSB</i> (rB–, mB–) <i>gal dcm</i> (DE3)                                                                                                                                                                                                                                                                                                                            | Invitrogen                   |
| pBADHisA                                   | Arabinose-inducible expression vector, ampicillin resistant                                                                                                                                                                                                                                                                                                                            | Invitrogen                   |
| pBADPet                                    | pBADHisA derivative expressing <i>de novo</i> synthesized Pet                                                                                                                                                                                                                                                                                                                          | <sup>3</sup>                 |
| pBADPet $\Delta$ L3                        | pBADPet derivative containing a <i>de novo</i> synthesized NgoMIV-AatII fragment that contains three G residues between A <sub>1129</sub> and T <sub>1136</sub> to express Pet with a L3 truncation                                                                                                                                                                                    | GenScript<br>/<br>This study |
| pBADPet $\Delta$ L4                        | pBADPet derivative containing a <i>de novo</i> synthesized NgoMIV-AatII fragment that contains three G residues between K <sub>1176</sub> and K <sub>1192</sub> to express Pet with a full L4 truncation                                                                                                                                                                               | GenScript<br>/<br>This study |
| pBADPet $\Delta$ L4P                       | pBADPet derivative containing a <i>de novo</i> synthesized NgoMIV-AatII fragment that contains three G residues between F <sub>1178</sub> and M <sub>1189</sub> to express Pet with a partial L4 truncation                                                                                                                                                                            | GenScript<br>/<br>This study |
| pBADPet $\Delta$ L5                        | pBADPet derivative containing a <i>de novo</i> synthesized KpnI-EcoRI fragment that contains three G residues between N <sub>1231</sub> and E <sub>1248</sub> to express Pet with a L5 truncation                                                                                                                                                                                      | GenScript<br>/<br>This study |
| pBADPet <sup>L5<math>\beta</math>1/G</sup> | pBADPet derivative containing a <i>de novo</i> synthesized AatII-EcoRI fragment where E <sub>1233</sub> , T <sub>1234</sub> , V <sub>1235</sub> , L <sub>1236</sub> , R <sub>1237</sub> , D <sub>1238</sub> in $\beta$ -strand 1 of L5 are mutated to G to assess if these residues play a role in passenger domain folding                                                            | GenScript<br>/<br>This study |
| pBADPet <sup>L5<math>\beta</math>2/G</sup> | pBADPet derivative containing a <i>de novo</i> synthesized AatII-EcoRI fragment where E <sub>1242</sub> , K <sub>1243</sub> , R <sub>1244</sub> , I <sub>1245</sub> , K <sub>1246</sub> in $\beta$ -strand 2 of L5 are mutated to G to assess if these residues play a role in passenger domain folding                                                                                | GenScript<br>/<br>This study |
| pBADPet <sup>L5Un/G</sup>                  | pBADPet derivative containing a <i>de novo</i> synthesized AatII-EcoRI fragment where L <sub>1228</sub> , F <sub>1229</sub> , A <sub>1230</sub> , N <sub>1231</sub> , E <sub>1248</sub> , K <sub>1249</sub> , D <sub>1250</sub> in the unstructured region beneath $\beta$ -strands 1 and 2 of L5 are mutated to G to assess if these residues play a role in passenger domain folding | GenScript<br>/<br>This study |
| pBADPet <sup>L5VLI/N</sup>                 | pBADPet derivative containing a <i>de novo</i> synthesized AatII-EcoRI fragment where V <sub>1235</sub> , L <sub>1236</sub> , I <sub>1245</sub> in $\beta$ -strands 1 and 2 of L5 are mutated to N to assess if hydrophobic residues within L5 play a role in passenger domain folding                                                                                                 | GenScript<br>/<br>This study |
| pBADPet <sup>L5R/D,E/K</sup>               | pBADPet derivative containing a <i>de novo</i> synthesized AatII-EcoRI fragment where R <sub>1237</sub> and E <sub>1233</sub> in $\beta$ -strand 1 of L5 are mutated to D and K, respectively to disturb the putative salt bridges between R <sub>1237</sub> and E <sub>1242</sub> , and E <sub>1233</sub> and R <sub>1244</sub>                                                       | GenScript<br>/<br>This study |

|                             |                                                                                                                                                                                                                                                                                                    |                              |
|-----------------------------|----------------------------------------------------------------------------------------------------------------------------------------------------------------------------------------------------------------------------------------------------------------------------------------------------|------------------------------|
| pBADPet <sup>L5TD/A</sup>   | pBADPet derivative containing a <i>de novo</i> synthesized AatII-EcoRI fragment where T <sub>1234</sub> and D <sub>1238</sub> in β-strand 1 of L5 are mutated to A to assess if these residues within L5 play a role in passenger domain folding                                                   | GenScript<br>/<br>This study |
| pBADPet <sup>L5FadL</sup>   | pBADPet derivative containing a <i>de novo</i> synthesized AatII-EcoRI fragment where β-strands 1 and 2 of L5 are replaced with a loop region from FadL (PDB 3DWO) that forms a β-hairpin structure to assess if a β-hairpin of an unrelated OMP supports passenger domain folding                 | GenScript<br>/<br>This study |
| pBADPet <sup>L5OmpF</sup>   | pBADPet derivative containing a <i>de novo</i> synthesized AatII-EcoRI fragment where β-strands 1 and 2 of L5 are replaced with a loop region from OmpF (PDB 2ZFG) that forms a β-hairpin structure to assess if a β-hairpin of an unrelated OMP supports passenger domain folding                 | GenScript<br>/<br>This study |
| pBADPet <sup>L5β1/P</sup>   | pBADPet derivative where E <sub>1233</sub> , T <sub>1234</sub> , V <sub>1235</sub> , L <sub>1236</sub> , R <sub>1237</sub> , D <sub>1238</sub> in β-strand 1 of L5 are mutated to P to eliminate potential hydrogen bonds for β-strand augmentation                                                | This study                   |
| pBADPet <sup>L5/5aa</sup>   | pBADPet derivative containing a <i>de novo</i> synthesized AatII-EcoRI fragment where the 6-residue long β-strands were shortened to 5 residues                                                                                                                                                    | GenScript<br>/<br>This study |
| pBADPet <sup>L5/4aa</sup>   | pBADPet derivative containing a <i>de novo</i> synthesized AatII-EcoRI fragment where the 6-residue long β-strands were shortened to 4 residues                                                                                                                                                    | GenScript<br>/<br>This study |
| pBADPet <sup>L5/3aa</sup>   | pBADPet derivative containing a <i>de novo</i> synthesized AatII-EcoRI fragment where the 6-residue long β-strands were shortened to 3 residues                                                                                                                                                    | GenScript<br>/<br>This study |
| pBADPet <sup>L5/2aa</sup>   | pBADPet derivative containing a <i>de novo</i> synthesized AatII-EcoRI fragment where the 6-residue long β-strands were shortened to 2 residues                                                                                                                                                    | GenScript<br>/<br>This study |
| pBADPet <sup>L5/1aa</sup>   | pBADPet derivative containing a <i>de novo</i> synthesized AatII-EcoRI fragment where the 6-residue long β-strands were shortened to 1 residue                                                                                                                                                     | GenScript<br>/<br>This study |
| pBADPet <sup>L5EstA</sup>   | pBADPet derivative containing a <i>de novo</i> synthesized AatII-EcoRI fragment where β-strands 1 and 2 of L5 are replaced with a loop region from EstA (PDB 3KVN) that forms a β-hairpin structure to assess if the L5 β-hairpin of a non-SPATE autotransporter supports passenger domain folding | GenScript<br>/<br>This study |
| pBADPet <sup>L5AIDA-I</sup> | pBADPet derivative containing a <i>de novo</i> synthesized AatII-EcoRI fragment where the L5 β-hairpin is replaced with a loop region from AIDA-I (PDB 4MEE) that forms a β-hairpin structure to assess if the L5 β-hairpin of a non-SPATE autotransporter supports passenger domain folding       | GenScript<br>/<br>This study |
| pBADEspP                    | pBADHisA derivative expressing <i>de novo</i> synthesized EspP                                                                                                                                                                                                                                     | GenScript<br>/<br>This study |
| pBADEspPAL5                 | pBADPet derivative containing a <i>de novo</i> synthesized SalI-HindIII fragment that contains three G residues between N <sub>1236</sub> and E <sub>1253</sub> to express EspP with a L5 truncation                                                                                               | GenScript<br>/<br>This study |
| pET-22b+                    | IPTG-inducible expression vector allowing a C-terminal hexahistidine-tag fusion, ampicillin resistant                                                                                                                                                                                              | Novagen                      |

|                             |                                                                                                                                           |            |
|-----------------------------|-------------------------------------------------------------------------------------------------------------------------------------------|------------|
| pETPet <sup>Δ1-554</sup>    | Truncated pBADPet derivative containing a hexahistidine-tagged Pet barrel-domain and the last 464 residues of the Pet passenger domain    | This study |
| pETPetΔL5 <sup>Δ1-554</sup> | Truncated pBADPetΔL5 derivative containing a hexahistidine-tagged Pet barrel-domain and the last 464 residues of the Pet passenger domain | This study |

Note that the numbers next to the amino acid residues correspond to their position relative to the full-length Pet protein (from M<sup>1</sup> to F<sup>1295</sup>) and full-length EspP protein (from M<sup>1</sup> to F<sup>1300</sup>).

### Supplementary Table 2. Primers used in this study

| Primer       | Sequence                                                                               | Reference    |
|--------------|----------------------------------------------------------------------------------------|--------------|
| NdeIPet464Fw | 5'-GGGAATTCCATATGCAGGCGAACTCTATCTCT-3'                                                 | This study   |
| XhoIPetRv    | 5'-CCGCTCGAGAGAGCCGAAAGAGTAACGGAAGTTC-3'                                               | <sup>3</sup> |
| SallIPetFw   | 5'-GCTGGT <b>CGACTT</b> CATCGAAAAAAAAAGG-3'                                            | This study   |
| HindIIIPetRv | 5'-CAGCCA <b>AGCTTTT</b> TATCAATGATGATGAT-3'                                           | This study   |
| MPL5β1Pro    | 5'-TTCGACCTGTT <b>CGCTAACGGTCCGCCACCTCCGCC</b><br><u>ACCGGCTTCTGGTGAAAAACGTATC</u> -3' | This study   |

Restriction enzyme sequences are in bold font, insertion sequences (Gly-Ser linker) are italicized, and site-directed mutations are underlined.

### Supplementary References

1. Edgar, R.C. MUSCLE: multiple sequence alignment with high accuracy and high throughput. *Nucleic Acids Res.* **32**, 1792-1797 (2004).
2. Baba, T. et al. Construction of *Escherichia coli* K-12 in-frame, single-gene knockout mutants: the Keio collection. *Mol Syst Biol* **2**(2006).
3. Leyton, D.L. et al. A mortise–tenon joint in the transmembrane domain modulates autotransporter assembly into bacterial outer membranes. *Nat Commun* **5**(2014).
